# Supplementary material for: Electronic Absorption, Emission, and Two-Photon Absorption Properties of Some Extended 2,4,6-Triphenyl-1,3,5-Triazines
Source: MDPI journal article supplement (doi:10.3390/photochem2020023), 2022-05-18
Supplement: s1 [file s1]

# Electronic Absorption, Emission and Two-Photon Absorption Properties of Some Extended 2,4,6-Triphenyl-1,3,5-triazines

Alison. G. Barnes,<sup>1</sup> Nicolas Richy,<sup>1</sup> Anissa Amar,<sup>2,3</sup> Mireille Blanchard-Desce,<sup>4</sup> Abdou Boucekkine,<sup>1,\*</sup> Olivier Mongin,<sup>1</sup> and Frédéric Paul<sup>1,\*</sup>

<sup>1</sup> ISCR (Institut des Sciences Chimiques de Rennes), Univ Rennes, CNRS, UMR 6226, 35000 Rennes, France; sidereus.nuncius.au@gmail.com (A.B.); nicolas.richy@univ-rennes1.fr (N.R.); olivier.mongin@univ-rennes1.fr (O.M.)

<sup>2</sup> Laboratoire de Physique et Chimie Quantiques, Faculté des Sciences, Université Mouloud Mammeri de Tizi-Ouzou, 15000 Tizi-Ouzou, Algeria; anissa.amar@ummto.dz (A.A)

<sup>3</sup> Faculté de Chimie, Université des Sciences et de la Technologie Houari-Boumediene, 16111 Bab-Ezzouar, Algeria

<sup>4</sup> Université de Bordeaux, Institut des Sciences Moléculaires (CNRS UMR 5255), 33405 Talence, France

\* Correspondence: abdou.boucekkine@univ-rennes1.fr (A.B.); frederic.paul@univ-rennes1.fr (F.P.); Tel.: +33-02-23-23-59-62 (F.P.)

## Including:

|                                                                                                                                                                    |        |
|--------------------------------------------------------------------------------------------------------------------------------------------------------------------|--------|
| 1. Synthesis and characterization of known compounds                                                                                                               | p. S2  |
| 2. <sup>1</sup> H / <sup>13</sup> C{ <sup>1</sup> H} NMR spectra for the new compounds <b>3-NMe<sub>2</sub></b> , <b>4</b> , <b>5-H</b> , <b>3-NPh<sub>2</sub></b> | p. S5  |
| 3. Absorption/emission data for <b>3-X</b> , <b>4</b> and <b>7-X</b>                                                                                               | p. S11 |
| 4. Two-photon excited fluorescence (2PEF) data for selected <b>3-X</b> and <b>7-X</b> derivatives                                                                  | p. S13 |
| 5. Cartesian coordinates of the DFT optimized geometries for <b>3-X</b> , <b>4</b> , <b>7-X</b> and <b>9a-b/10a-b/11a-b</b>                                        | p. S15 |
| 6. Selected frontier MOs for <b>3-X</b> , <b>4</b> and <b>7-X</b>                                                                                                  | p. S25 |
| 7. Computed dipole moments for <b>3-X</b> , <b>4</b> and <b>7-X</b>                                                                                                | p. S31 |
| 8. Computed bandgaps for <b>3-X</b> , <b>4</b> and <b>7-X</b>                                                                                                      | p. S32 |
| 9. Computed singlet lowest-lying transitions for <b>3-X</b> , <b>4</b> and <b>7-X</b>                                                                              | p. S32 |
| 10. Computed 2PA spectra for selected <b>3-X</b> and <b>7-X</b> compounds                                                                                          | p. S37 |
| 11. Derivation of <i>N<sub>eff</sub></i> values for <b>1-X</b> , <b>2-X</b> , <b>3-X</b> , <b>4</b> , <b>7-X</b> and <b>7-X</b> derivatives                        | p. S40 |
| 12. References                                                                                                                                                     | p. S41 |

## 1. Synthesis and characterization of known compounds

**2,4,6-tris(4-bromophenyl)-1,3,5-triazine (8-Br).**[1] A flask containing triflic acid (9 mL, 15 g, 102 mmol) under argon was cooled to 0-4 °C (ice bath). In batches of approximately 0.5 g solid 4-bromobenzonitrile (4.67 g, 25.6 mmol) was added with stirring, the addition takes about 1.5 h. The homogenous, yellow solution was allowed to slowly warm to room temperature and stirred overnight. The reaction was quenched with ice and then neutralized using aqueous NH<sub>4</sub>OH solution. The white precipitate was collected on a glass frit and thoroughly washed with water (3 × 10 mL) followed by acetone (2 × 10 mL) and acetone/dichloromethane (1:1 mixture, 2 × 10 mL). The solid was air-dried for 2 h then transferred to flask and dried under high vacuum for 6 h giving the title compound as a white powder (4.34 g, 7.9 mol, 93%). Spectroscopic characterisation matched that reported in the literature.[2] **<sup>1</sup>H NMR (300 MHz, CDCl<sub>3</sub>):**  $\delta$  = 8.62 (m, 2H, AA'XX<sub>3</sub>, H<sub>Ph</sub>); 7.73 (m, 2H, AA'XX', H<sub>Ph</sub>). **IR (KBr, cm<sup>-1</sup>):**  $\bar{\nu}$  = 3060, 3035 (vw, C<sub>Ar</sub>-H); 1580 (s); 1512 (overlapping, C=C<sub>Ar</sub>/C=N<sub>triazine</sub>, s). **Raman (neat, cm<sup>-1</sup>):**  $\bar{\nu}$  = 1590 (vs, C=C<sub>Ar</sub>); 1580 (w, sh); 1513 (m, C=N<sub>triazine</sub>); 989 (s, C=N<sub>triazine</sub>).

**2,4,6-tris(4-iodophenyl)-1,3,5-triazine (8-I).** In a round bottom flask under argon, triflic acid (5 ml) was cooled to 0-4 °C (ice bath). Solid 4-iodobenzonitrile (2.33 g) was added in batches, with stirring, over a period of 1 h. The homogenous, yellow solution was allowed to slowly warm to room temperature and stirred overnight. The reaction mixture was quenched with ice and then neutralized with aqueous NH<sub>4</sub>OH solution. The white precipitate was collected on a glass frit and washed with water (3 × 10 mL), acetone (2 × 10 mL) and finally acetone/CH<sub>2</sub>Cl<sub>2</sub> (1:1 mixture, 2 × 10 mL). The solid was air dried for 1 h then transferred to a flask and dried under high vacuum for 8 h. The title compound was isolated a white powder (1.98 g, 85%). **HRMS (ASAP):** m/z = 687.8240 [M+H]<sup>+</sup> (calc. for C<sub>21</sub>H<sub>13</sub>N<sub>3</sub>I<sub>3</sub>: 687.8244). **Anal. Calc. for C<sub>21</sub>H<sub>12</sub>N<sub>3</sub>I<sub>3</sub>:** C, 36.71, H, 1.76, N, 6.12; found: C, 36.52, H, 1.76, N, 6.15. Spectroscopic characterisation matched that reported in the literature.[2] **<sup>1</sup>H NMR (300 MHz, CDCl<sub>3</sub>):**  $\delta$  = 8.44 (m, 2H, AA'XX', H<sub>Ph</sub>); 7.93 (m, 2H, AA'XX', H<sub>Ph</sub>). **IR (KBr, cm<sup>-1</sup>):**  $\bar{\nu}$  = 3060 and 3035 (vw, C<sub>Ar</sub>-H); 1576 (s, C=C<sub>Ar</sub>); 1525-1506 (overlapping, vs, C=C<sub>Ar</sub>/C=N<sub>triazine</sub>). **Raman (neat, cm<sup>-1</sup>):**  $\bar{\nu}$  = 3064 (w, C<sub>Ar</sub>-H); 1590 (vs, C=C<sub>Ar</sub>); 1527-1508 (overlapping, m, C=C<sub>Ar</sub>/C=N<sub>triazine</sub>); 990 (m, C=N<sub>triazine</sub>).

**2,4,6-tris{4-(2-trimethylsilylethynyl)phenyl}-1,3,5-triazine (8-C≡CTMS).** This compound was obtained following a modification of the literature procedure reported by Jia and coworkers.[3] An oven-dried Schlenk flask was charged with **8-Br** (501 mg, 0.917 mmol), Pd(PPh<sub>3</sub>)<sub>4</sub> (63 mg, 0.054 mmol) and CuI (22 mg, 0.115 mmol) and degassed (4 × vacuum/argon cycles). Degassed NEt<sub>3</sub> (15 mL) was added using a cannula transfer followed by ethynyl trimethylsilane (0.7 mL, 4.9 mmol). The flask was

## Supporting Information

fitted with a condenser and the reaction mixture refluxed for 2 days. The mixture was allowed to cool slightly then filtered to remove the insoluble salts, the solid was washed with hot  $\text{NEt}_3$ . The filtrate was allowed to cool to room temperature and then placed in a fridge for 3 h, the white precipitate was collected on a glass frit and washed with hexanes. The solid was recrystallized from hot hexanes and dried under reduced pressure (high vacuum, 6 h) giving the title product as fluffy, colourless needles (330 mg, 60%). **MP:** 268 °C. **HRMS (ASAP):**  $m/z = 598.2527$   $[\text{M}+\text{H}]^+$  (calc. for  $\text{C}_{36}\text{H}_{40}\text{N}_3\text{Si}_3$ : 598.2530). Spectroscopic characterisation matched these reported in the literature.[3, 4]  **$^1\text{H}$  NMR (300 MHz,  $\text{CDCl}_3$ ):**  $\delta = 8.69$  (m, 6H, AA'XX',  $H_{\text{Ph}}$ ); 7.65 (m, 6H, AA'XX'  $H_{\text{Ph}}$ ); 0.30 (s, 27H,  $\text{SiCH}_3$ ). **IR (KBr,  $\text{cm}^{-1}$ ):**  $\bar{\nu} = 2958$  (m,  $\text{C}_{\text{Ar-H}}$ ), 2898 (w,  $\text{C}_{\text{Ar-H}}$ ), 2157 (s,  $\text{C}\equiv\text{C}$ ), 1604 (m), 1572 (s), 1511 (vs,  $\text{C}=\text{N}_{\text{triazine}}$ ). **Raman (neat,  $\text{cm}^{-1}$ ):**  $\bar{\nu} = 2960$  (m,  $\text{C}_{\text{Ar-H}}$ ); 2900 (w,  $\text{C}_{\text{Ar-H}}$ ); 2160 (s,  $\text{C}\equiv\text{C}$ ); 1604 (vs,  $\text{C}=\text{C}_{\text{Ar}}$ ); 1513 (m,  $\text{C}=\text{N}_{\text{triazine}}$ ); 991 (w,  $\text{C}=\text{N}_{\text{triazine}}$ ). **UV-Vis ( $\text{CH}_2\text{Cl}_2$ , nm [ $\epsilon$ ,  $10^3 \text{ M}^{-1}\text{cm}^{-1}$ ]):**  $\lambda_{\text{max}} = 320$  [106].

**2,4,6-tris(4-ethynylphenyl)-1,3,5-triazine (8-C $\equiv$ CH).** In a round bottom flask,  $\text{K}_2\text{CO}_3$  (5.37 g) was added to a solution of **8-C $\equiv$ CTMS** (125 mg, 0.209 mmol) in methanol/ $\text{CH}_2\text{Cl}_2$ / $\text{H}_2\text{O}$  (15 mL / 50 mL / 1.5 mL). The mixture was stirred at room temperature for 2 h then filtered. The solid was thoroughly washed with  $\text{CH}_2\text{Cl}_2$  and then the filtrate was concentrated under reduced pressure (rotavap). The resulting precipitate was collected on a glass frit, washed with methanol and dried giving the title compound as a colourless powder (55 mg, 69%). **HRMS (ASAP):**  $m/z = 381.128$   $[\text{M}+\text{H}]^+$  (calc. for  $\text{C}_{27}\text{H}_{16}\text{N}_3$ : 381.127). Spectroscopic characterisation matched these reported in the literature.[3, 4]  **$^1\text{H}$  NMR (300 MHz,  $\text{CDCl}_3$ ):**  $\delta = 8.72$  (d,  $J = 8.4$  Hz, AA'XX', 6H,  $H_{\text{Ph}}$ ,  $\text{H}_2'/6'$ ); 7.69 (d,  $J = 8.4$  Hz, AA'XX', 6H,  $H_{\text{Ph}}$ ,  $\text{H}_3'/5'$ ); 3.28 (s, 3H,  $\text{C}\equiv\text{CH}$ ). **IR (KBr,  $\text{cm}^{-1}$ ):**  $\bar{\nu} = 3287, 3238$  (m, s,  $\text{C}_{\text{Ar-H}}$  &  $\equiv\text{C-H}$ ); 1605 (w,  $\text{C}=\text{C}_{\text{Ar}}$ ); 1574 (s,  $\text{C}=\text{C}_{\text{Ar}}$ ); 1514 (vs,  $\text{C}=\text{N}_{\text{triazine}}$ ). **Raman (neat,  $\text{cm}^{-1}$ ):**  $\bar{\nu} = 2110$  (s,  $\text{C}\equiv\text{C}$ ); 1605 (vs,  $\text{C}=\text{C}_{\text{Ar}}$ ); 1576 (vw,  $\text{C}=\text{C}_{\text{Ar}}$ ); 1514 (m,  $\text{C}=\text{N}_{\text{triazine}}$ ); 990 (w,  $\text{C}=\text{N}_{\text{triazine}}$ ). **UV-Vis ( $\text{CH}_2\text{Cl}_2$ , nm [ $\epsilon$ ,  $10^3 \text{ M}^{-1}\text{cm}^{-1}$ ]):**  $\lambda_{\text{max}} = 303$  [90].

**2,4,6-tris(4'-[(4''-cyano)-2'''-phenylethynyl]phenyl)-1,3,5-triazine (3-CN).** A dry Schlenk flask was charged with **8-I** (200 mg, 0.291 mmol),  $\text{Pd}(\text{PPh}_3)_4$  (34 mg, 0.029 mmol) and  $\text{CuI}$  (11 mg, 0.058 mmol) and then degassed ( $4 \times$  vacuum/argon cycles). A degassed mixture of DMF/ $\text{NEt}_3$  (3/1 mixture, 25 mL) was added using a cannula and finally ethynylbenzonitrile (185 mg, 1.45 mmol). The flask was sealed and heated at 55-60 °C for 3 days. The solvent was removed *in vacuo* and the residue dissolved in  $\text{CH}_2\text{Cl}_2$  and washed with water ( $2 \times 20$  mL), dried ( $\text{MgSO}_4$ ) and solvent removed under reduced pressure. The crude product was purified using flash column chromatography (Silica gel, eluting with  $\text{CHCl}_3$ ) giving the title product as a colourless powder (70 mg, 35%). **HRMS (ASAP):**  $m/z = 685.2136$   $[\text{M}+\text{H}]^+$  (calc. for  $\text{C}_{48}\text{H}_{25}\text{N}_6$ : 685.2135). **Anal. Calc. for  $\text{C}_{48}\text{H}_{24}\text{N}_6 \cdot \text{H}_2\text{O}$ :** C, 82.04, H, 3.73, N, 11.96; found: C, 82.11, H, 3.86, N, 11.36. Spectroscopic characterisation matched that reported in the literature.[5]  **$^1\text{H}$  NMR (400 MHz,**

### Supporting Information

**CDCl<sub>3</sub>**:  $\delta$  = 8.79 (d, splitting = 8.2 Hz, 6H, AA'XX',  $H_{Ph}$ ); 7.75 (d,  $J$  = 8.2 Hz, 6H, AA'XX',  $H_{Ph}$ ); 7.68 (s, 12H,  $H_{Ph}$ ). **<sup>13</sup>C{<sup>1</sup>H} NMR (101 MHz, CDCl<sub>3</sub>)**:  $\delta$  = 171.1 (C, C<sub>triazine</sub>); 136.3 (C<sub>Ph</sub>); 132.3 (C<sub>Ph</sub>H); 132.2 (C<sub>Ph</sub>H); 132.1 (C<sub>Ph</sub>H); 129.0 (C<sub>Ph</sub>H); 127.8 (C<sub>Ph</sub>); 126.6 (C<sub>Ph</sub>); 118.4 (C, CN); 112.0 (C, C<sub>Ph</sub>); 93.1 (C $\equiv$ C); 90.5 (C $\equiv$ C). **IR (KBr, cm<sup>-1</sup>)**:  $\bar{\nu}$  = 2224 (m, CN or C $\equiv$ C); 1604 (m, C=C<sub>Ar</sub>); 1569 (m, C=C<sub>Ar</sub>); 1511 (vs, C=N<sub>triazine</sub>). **Raman (neat, cm<sup>-1</sup>)**:  $\bar{\nu}$  = 2218 (s, CN or C $\equiv$ C); 1605 (vs, C=C<sub>Ar</sub>); 1519 (w, C=N<sub>triazine</sub>); 991 (w, C=N<sub>triazine</sub>).

**2,4,6-tris{4'-[(4''-methoxy)-2'''-phenylethynyl]phenyl}-1,3,5-triazine (3-OMe)**. A dry Schlenk flask was charged with **8-Br** (338 mg, 0.619 mmol), Pd(PPh<sub>3</sub>)<sub>4</sub> (72 mg, 0.062 mmol) and CuI (25 mg, 0.131 mmol) then degassed (4  $\times$  vacuum/argon cycles). Degassed NEt<sub>3</sub> (30 mL) was added using a cannula followed by ethynyl anisole (406 mg, 3.072 mmol). The flask was sealed and heated at 70 °C for 8 h. The reaction was allowed to cool slightly and analysed by TLC, the reaction was not complete probably due to a solubility issue, so degassed THF (30 mL) was added and heating resumed for another 18 h. The reaction mixture was allowed to cool to room temperature, filtered and the solvent removed *in vacuo*. The residue was dissolved in CH<sub>2</sub>Cl<sub>2</sub> and applied to a short column of silica, the plug was washed with an ethylacetate/hexanes mixture [1:5] to remove the excess starting alkyne and was then extracted with CH<sub>2</sub>Cl<sub>2</sub> then with CHCl<sub>3</sub>. The combined CH<sub>2</sub>Cl<sub>2</sub>/CHCl<sub>3</sub> solution was concentrated and hexanes added, the product precipitated and was collected on a glass frit and dried under reduced pressure. The product was isolated as a pale yellow powder (227 mg, 52%). **HRMS (ASAP)**:  $m/z$  = 700.2599 [M+H]<sup>+</sup> (calc. for C<sub>48</sub>H<sub>34</sub>N<sub>3</sub>O<sub>3</sub>: 700.2595). **Anal. Calc. for C<sub>48</sub>H<sub>33</sub>N<sub>3</sub>O<sub>3</sub>**: C, 82.38, H, 4.75, N, 6.00; found: C, 81.93, H, 4.74, N, 6.01. Spectroscopic characterisation matched that reported in the literature.[6] **<sup>1</sup>H NMR (400 MHz, CDCl<sub>3</sub>)**:  $\delta$  = 8.74 (d,  $J$  = 8.0 Hz, 6H,  $H_{Ph}$ ); 7.70 (d,  $J$  = 8.0 Hz, 6H,  $H_{Ph}$ ); 7.53 (d,  $J$  = 8.4 Hz, 6H,  $H_{Ph}$ ); 6.91 (d,  $J$  = 8.4 Hz, 6H,  $H_{Ph}$ ); 3.85 (s, 9H, OCH<sub>3</sub>). **<sup>13</sup>C{<sup>1</sup>H} NMR (101 MHz, CDCl<sub>3</sub>)**:  $\delta$  = 171.2 (C<sub>triazine</sub>); 160.1 (C<sub>Ph</sub>); 135.5 (C<sub>Ph</sub>); 133.4 (C<sub>Ph</sub>H); 131.8 (C<sub>Ph</sub>H); 129.0 (C<sub>Ph</sub>H); 128.1 (C<sub>Ph</sub>); 115.2 (C<sub>Ph</sub>); 114.3 (C<sub>Ph</sub>H); 92.6 (C $\equiv$ C); 88.3 (C $\equiv$ C); 55.5 (CH<sub>3</sub>). **IR (KBr, cm<sup>-1</sup>)**:  $\bar{\nu}$  = 2833 (w, C<sub>Ar</sub>-H); 2209 (m, C $\equiv$ C); 1599 (s, C=C<sub>Ar</sub>); 1568 (s, C=C<sub>Ar</sub>); 1512 (vs, C=N<sub>triazine</sub>). **Raman (neat, cm<sup>-1</sup>)**:  $\bar{\nu}$  = 2213 (s, C $\equiv$ C); 1603 (vs, C=C<sub>Ar</sub>); 1512 (m, C=N<sub>triazine</sub>); 990 (w, C=N<sub>triazine</sub>).

**2,4,6-tris{4'-[(4''-diphenylamino)-2'''-phenylethynyl]phenyl}-1,3,5-triazine (3-NPh<sub>2</sub>)**. A dry Schlenk flask was charged with **8-Br** (102 mgs, 0.187 mmol), Pd(PPh<sub>3</sub>)<sub>4</sub> (23 mg, 0.020 mmol) and CuI (7 mg, 0.037 mmol) and then degassed (4  $\times$  vacuum/argon cycles). Degassed NEt<sub>3</sub> (7 mL) was added using a cannula followed by degassed DMF (14 mL). The alkyne was rapidly added under a stream of argon then the flask was sealed. The reaction mixture was heated at 70 °C for 5 days. The solvent was removed *in vacuo*, the residue dissolved in CH<sub>2</sub>Cl<sub>2</sub> (100 mL), washed with water (3  $\times$  15 mL) and dried (MgSO<sub>4</sub>). The solvent was removed under reduced pressure and the crude material was purified using column

### Supporting Information

chromatography (neutral alumina, 3.5 cm × 15 cm, eluting with a CH<sub>2</sub>Cl<sub>2</sub>/hexanes [1:5] mixture), the title compound was then precipitated from CH<sub>2</sub>Cl<sub>2</sub>/hexane as a bright yellow powder (123 mg, 60%). **HRMS (ESI, CHCl<sub>3</sub>/MeOH[9:1]):** m/z = 1110.4402 [M]<sup>+</sup> (calc. for C<sub>81</sub>H<sub>54</sub>N<sub>6</sub>: 1110.4404). **Anal. Calc. for C<sub>81</sub>H<sub>54</sub>N<sub>6</sub>:** C, 87.54, H, 4.90, N, 7.56; found: C, 86.85, H, 5.02, N, 7.35. Spectroscopic characterisation matched that reported in the literature.[4] **<sup>1</sup>H NMR (400 MHz, CD<sub>2</sub>Cl<sub>2</sub>):** δ = 8.75 (d, J = 8.0 Hz, 6H, H<sub>Ph</sub>); 7.71 (d, J = 8.0 Hz, 6H, H<sub>Ph'</sub>); 7.42 (d, J = 8.4 Hz, 6H, H<sub>Ph'</sub>); 7.30 (m, 12H, H<sub>NPh<sub>2</sub></sub>); 7.14-7.07 (m, 18H, H<sub>NPh<sub>2</sub></sub>); 7.00 (d, J = 8.4 Hz, 6H, H<sub>Ph'</sub>). **<sup>13</sup>C{<sup>1</sup>H} NMR (101 MHz, CD<sub>2</sub>Cl<sub>2</sub>):** δ = 171.4 (C<sub>triazine</sub>); 148.8 (C<sub>ArH</sub>); 147.4 (NC<sub>Ph</sub>); 135.7 (C<sub>Ar</sub>); 133.0 (C<sub>ArH</sub>); 131.9 (C<sub>ArH</sub>); 129.8 (C<sub>NPh<sub>2</sub></sub>); 129.2 (C<sub>ArH</sub>); 128.4 (C<sub>Ar</sub>); 125.6 (C<sub>NPh<sub>2</sub></sub>); 124.2 (C<sub>NPh<sub>2</sub></sub>); 122.1 (C<sub>ArH</sub>); 115.6 (C<sub>Ar</sub>); 93.2 (C≡C); 88.7 (C≡C). **IR (KBr, cm<sup>-1</sup>):**  $\bar{\nu}$  = 3062 (w, C<sub>Ar</sub>-H); 2207 (m, C≡C); 1590 (s, C=C<sub>Ar</sub>); 1570 (m, C=C<sub>Ar</sub>); 1506 (vs, C=N<sub>triazine</sub>). **Raman (neat, cm<sup>-1</sup>):**  $\bar{\nu}$  = 3033 (vw, C<sub>Ar</sub>-H); 2208 (s, C≡C); 1605 (vs, C=C<sub>Ar</sub>); 1509 (w, C=N<sub>triazine</sub>); 992 (w, C=N<sub>triazine</sub>).

2.  $^1\text{H}$  /  $^{13}\text{C}\{^1\text{H}\}$  NMR spectra of selected compounds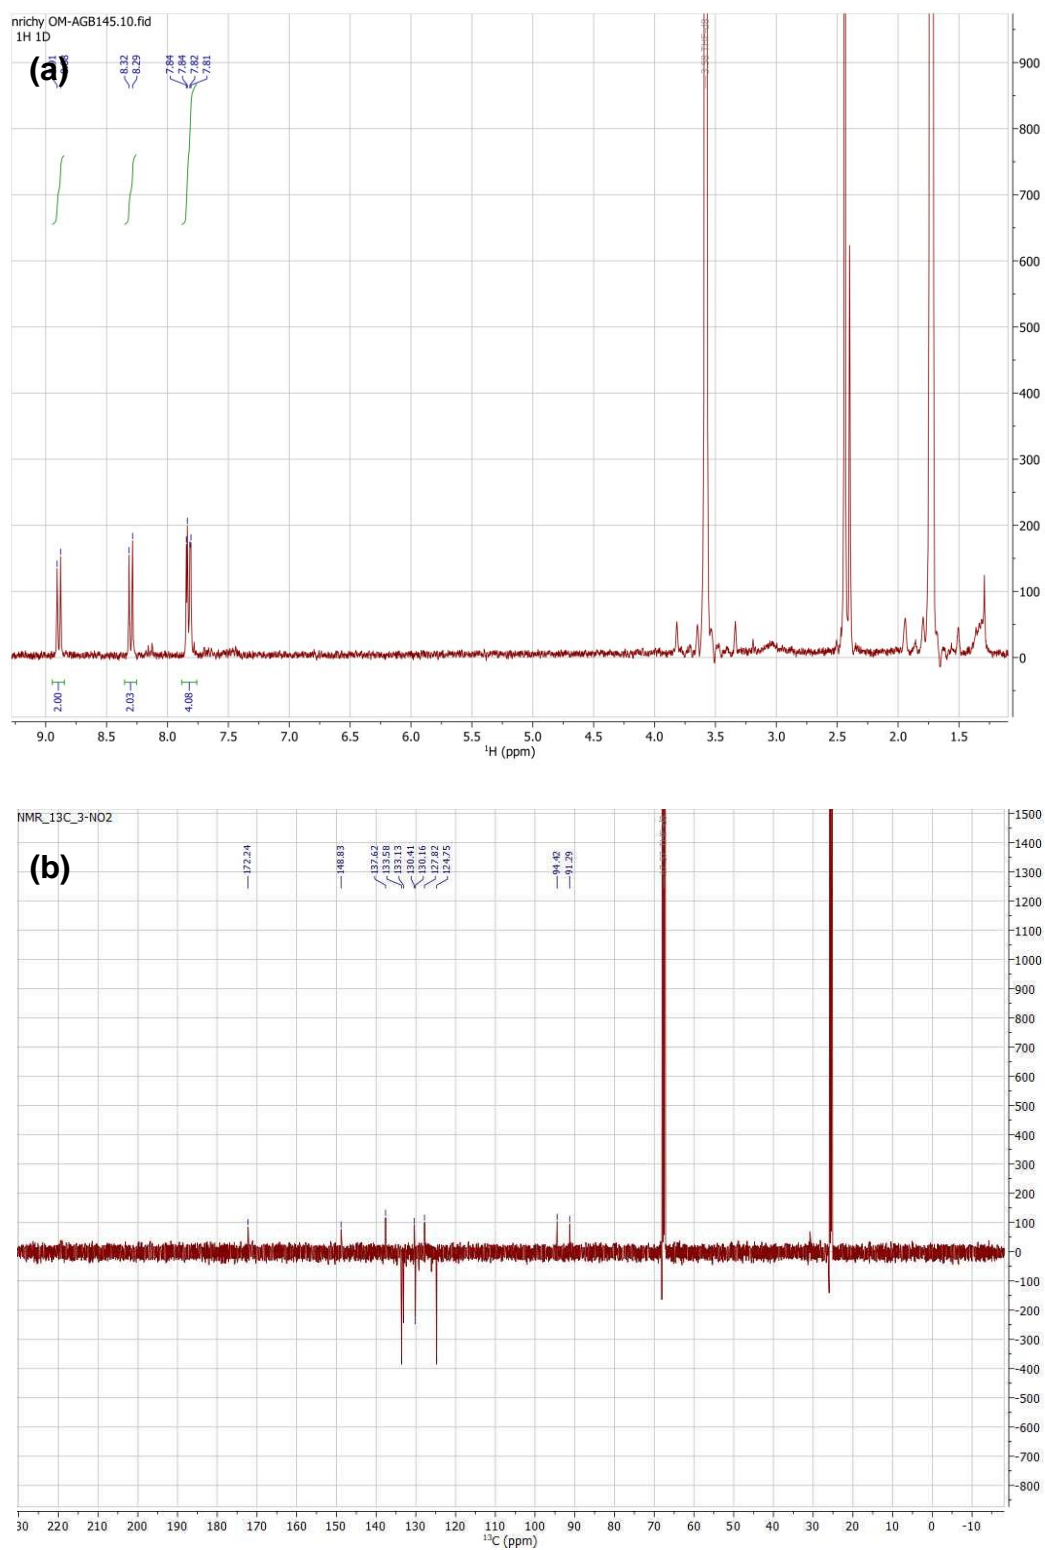

**Figure S1.**  $^1\text{H}$  (a) and  $^{13}\text{C}\{^1\text{H}\}$  (b) NMR spectra at 300 and 125 MHz, respectively, for **3-NO<sub>2</sub>** in THF-*d*<sub>8</sub>.

## Supporting Information

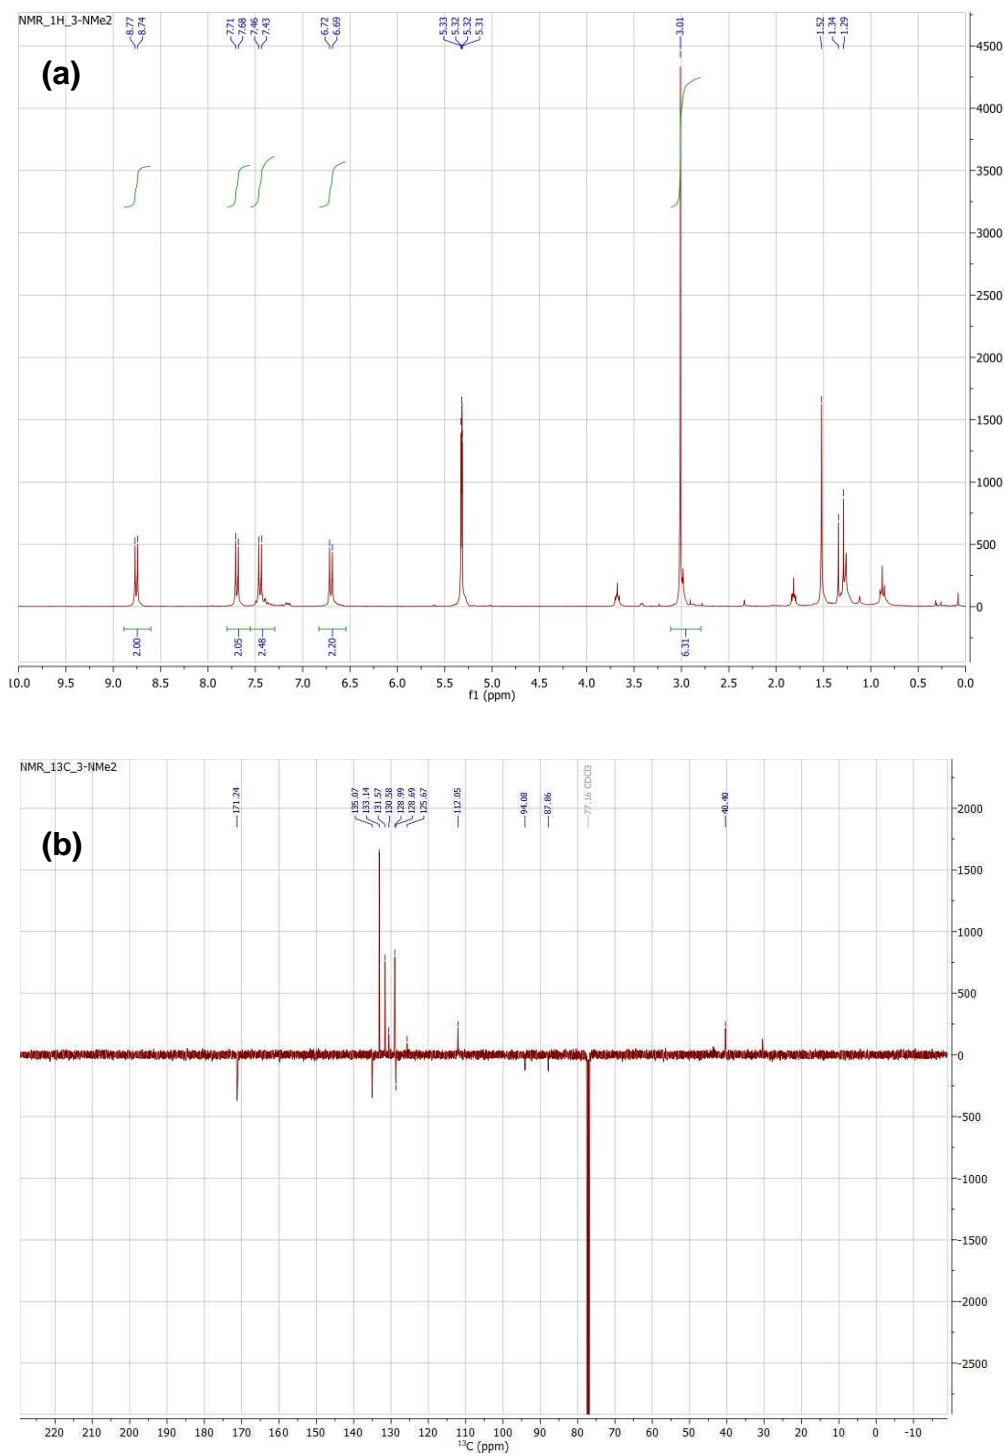

**Figure S2.** <sup>1</sup>H (a) and <sup>13</sup>C{<sup>1</sup>H} (b) NMR spectra at 500 and 126 MHz, respectively, for **3-NMe<sub>2</sub>** in CD<sub>2</sub>Cl<sub>2</sub>.

## Supporting Information

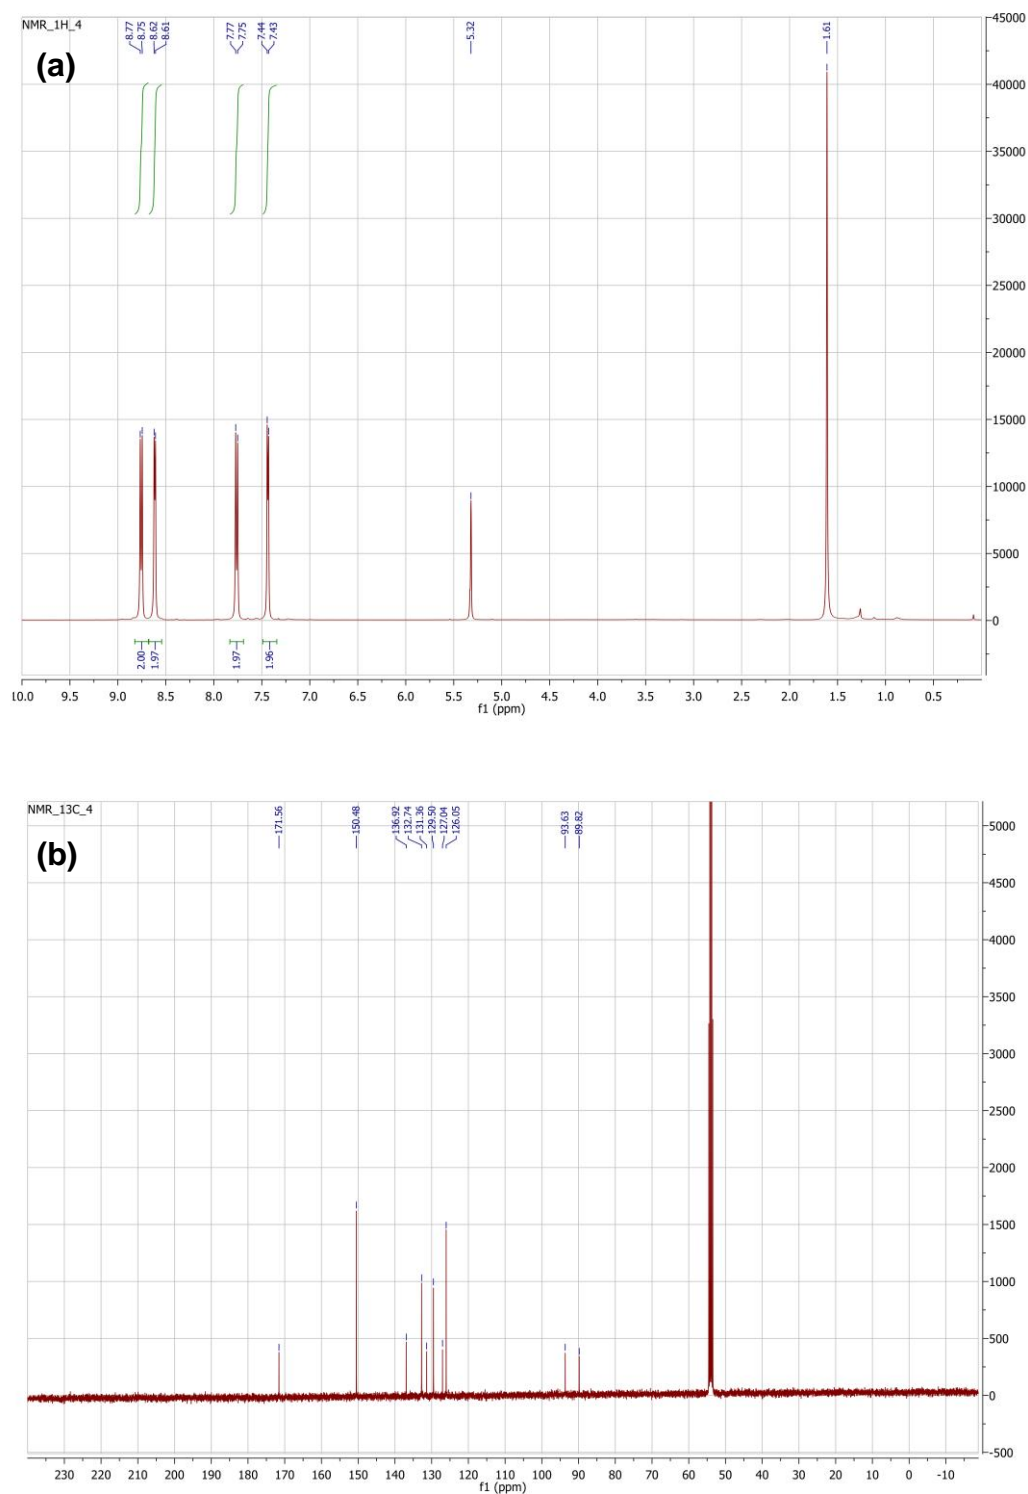

**Figure S3.**  $^1\text{H}$  (a) and  $^{13}\text{C}\{^1\text{H}\}$  (b) NMR spectra at 400 and 101 MHz, respectively, for **4** in  $\text{CD}_2\text{Cl}_2$ .

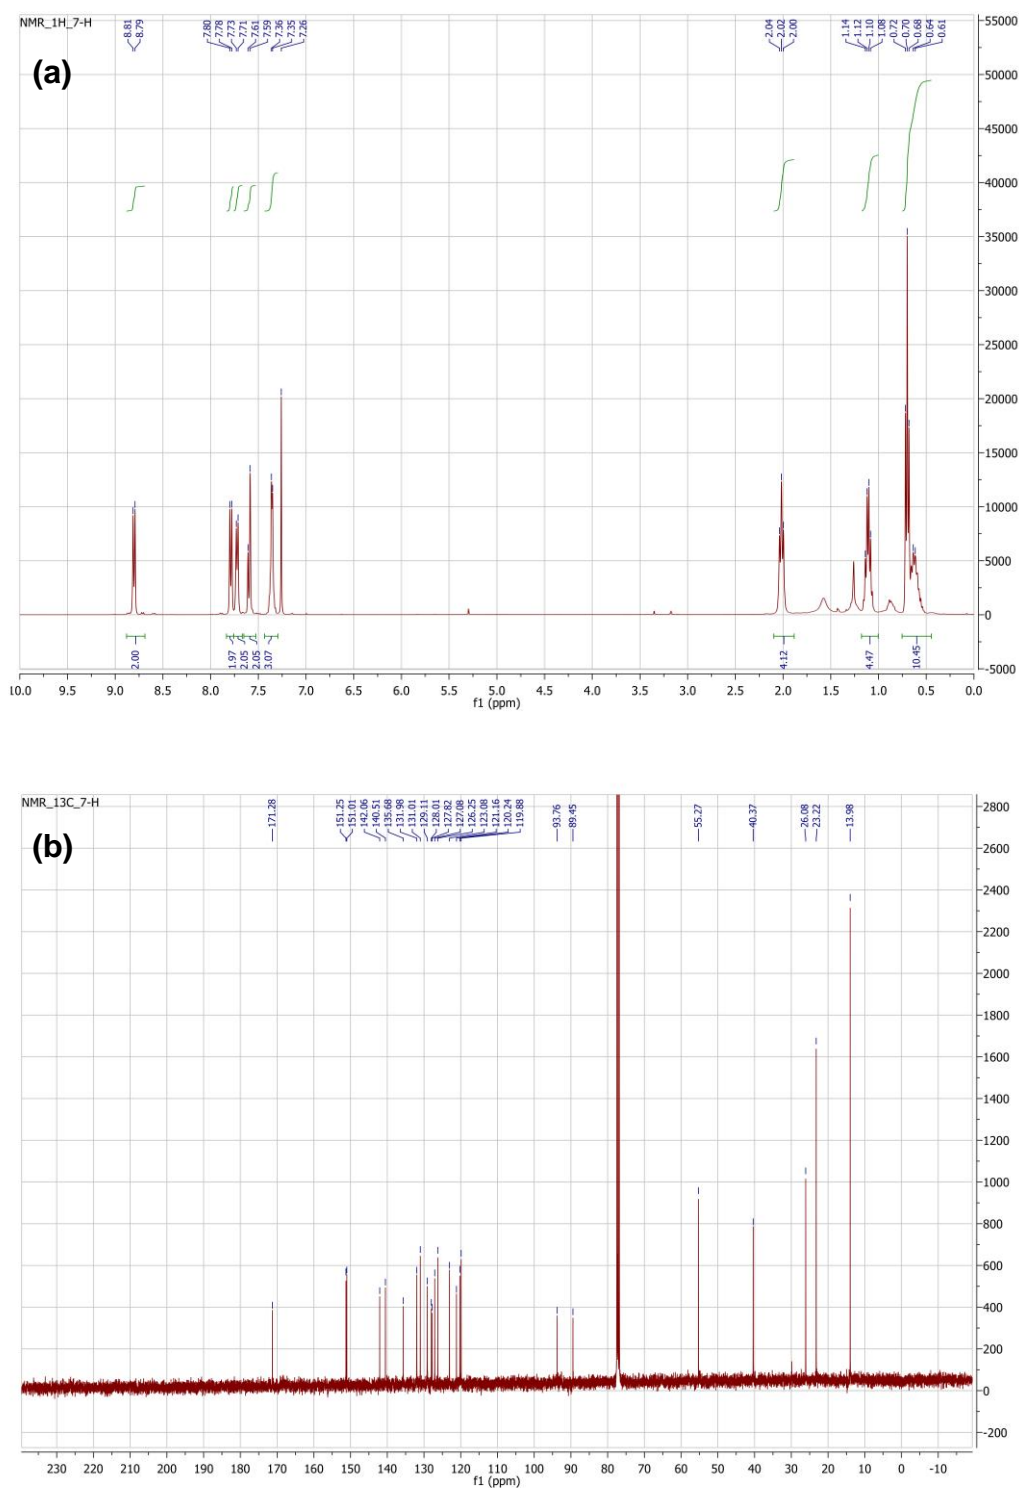

**Figure S4.** <sup>1</sup>H (a) and <sup>13</sup>C{<sup>1</sup>H} (b) NMR spectra at 400 and 101 MHz, respectively, for **7-H** in CDCl<sub>3</sub>.

# Supporting Information

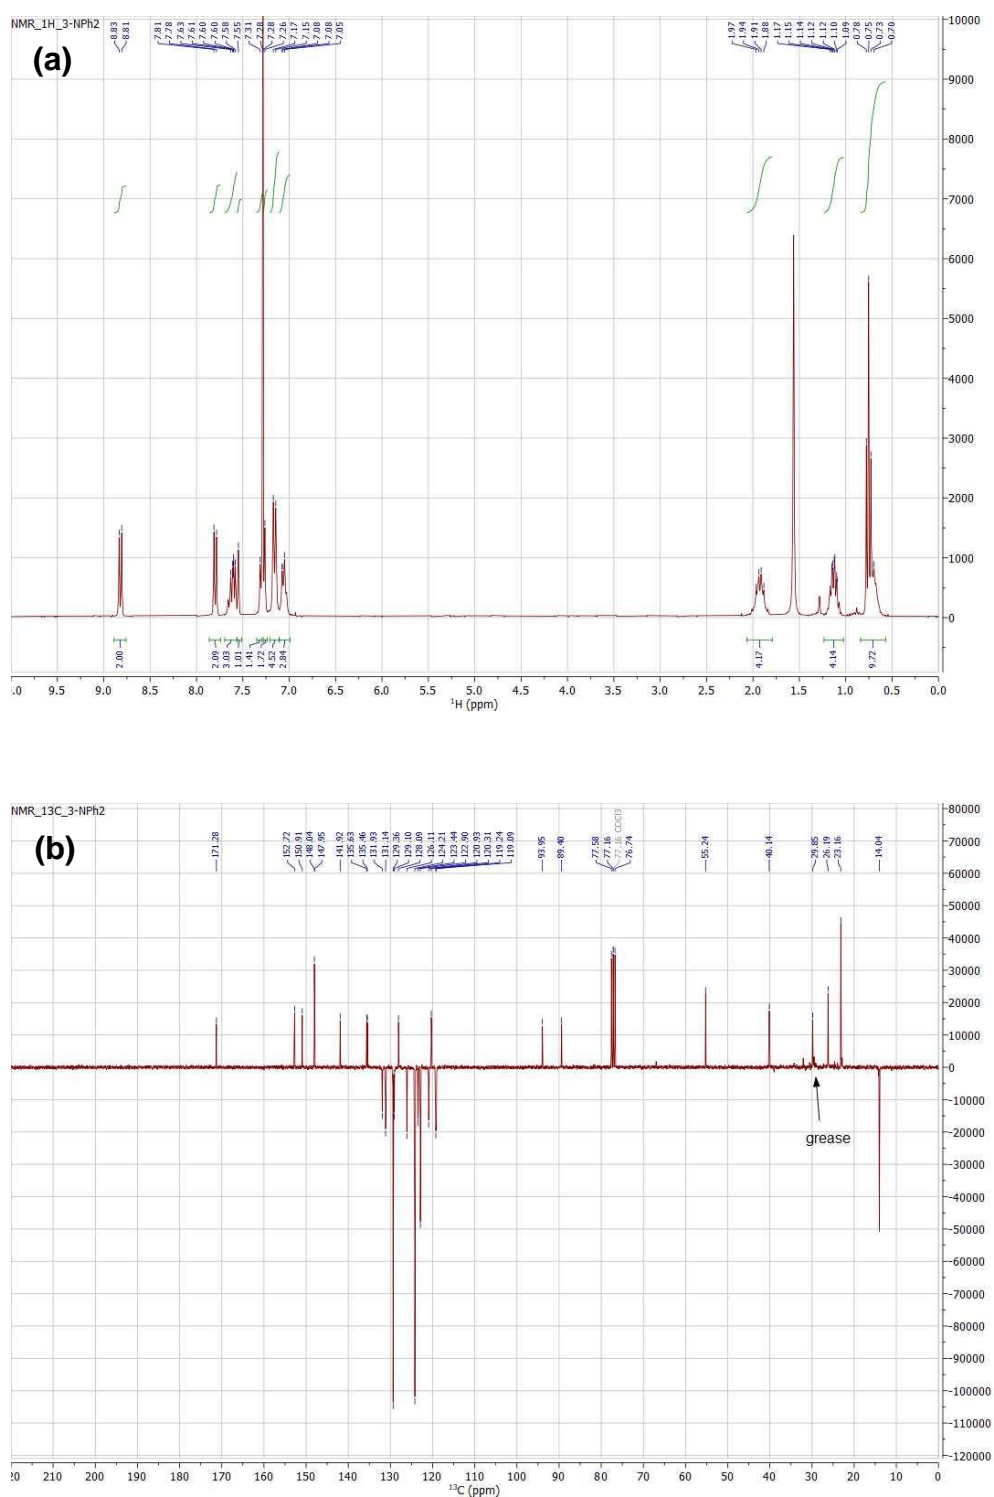

**Figure S5.** <sup>1</sup>H (a) and <sup>13</sup>C{<sup>1</sup>H} (b) NMR spectra at 300 and 75 MHz, respectively, for **7-NPh<sub>2</sub>** in CDCl<sub>3</sub>.

## 3. Absorption/emission data for 3-X, 4 and 7-X

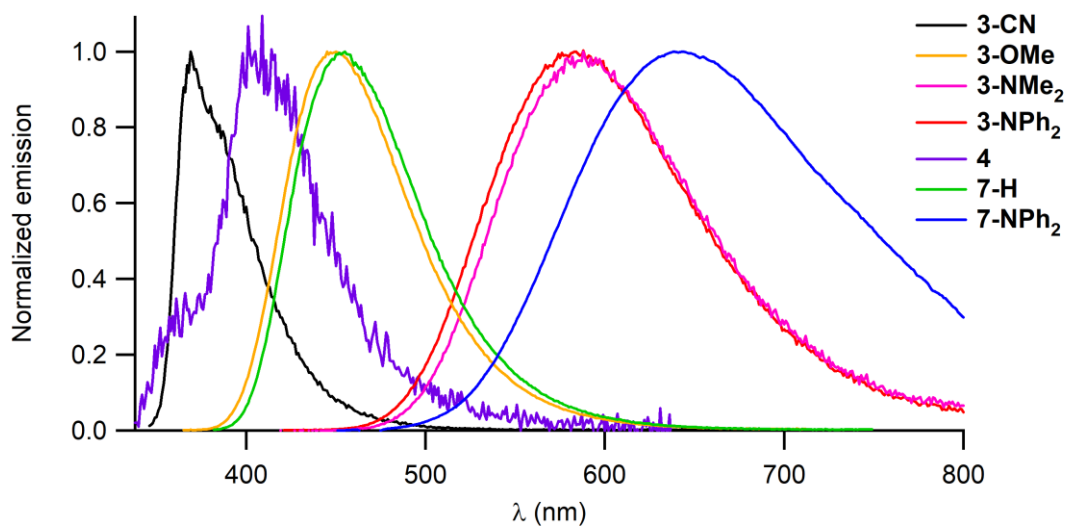

**Figure S6.** Emission spectra of compounds **3-X**, **4** and **7-X** in CH<sub>2</sub>Cl<sub>2</sub> at 298K.

**Table S1.** Absorption and emission properties of **3-NO<sub>2</sub>**, **3-NPh<sub>2</sub>** and **7-H** in THF at 25 °C.

| Cmpd                     | $\lambda_1$ (max)<br>[nm] | $\lambda_{em}$<br>[nm] | $\Phi_F^a$ | Stokes shift<br>[cm <sup>-1</sup> ] |
|--------------------------|---------------------------|------------------------|------------|-------------------------------------|
| <b>3-NO<sub>2</sub></b>  | 348                       | 554                    | 0.05       | 10685                               |
| <b>3-NPh<sub>2</sub></b> | 405                       | 568                    | 0.73       | 7086                                |
| <b>7-H</b>               | 376                       | 440                    | 0.78       | 3658                                |

## Supporting Information

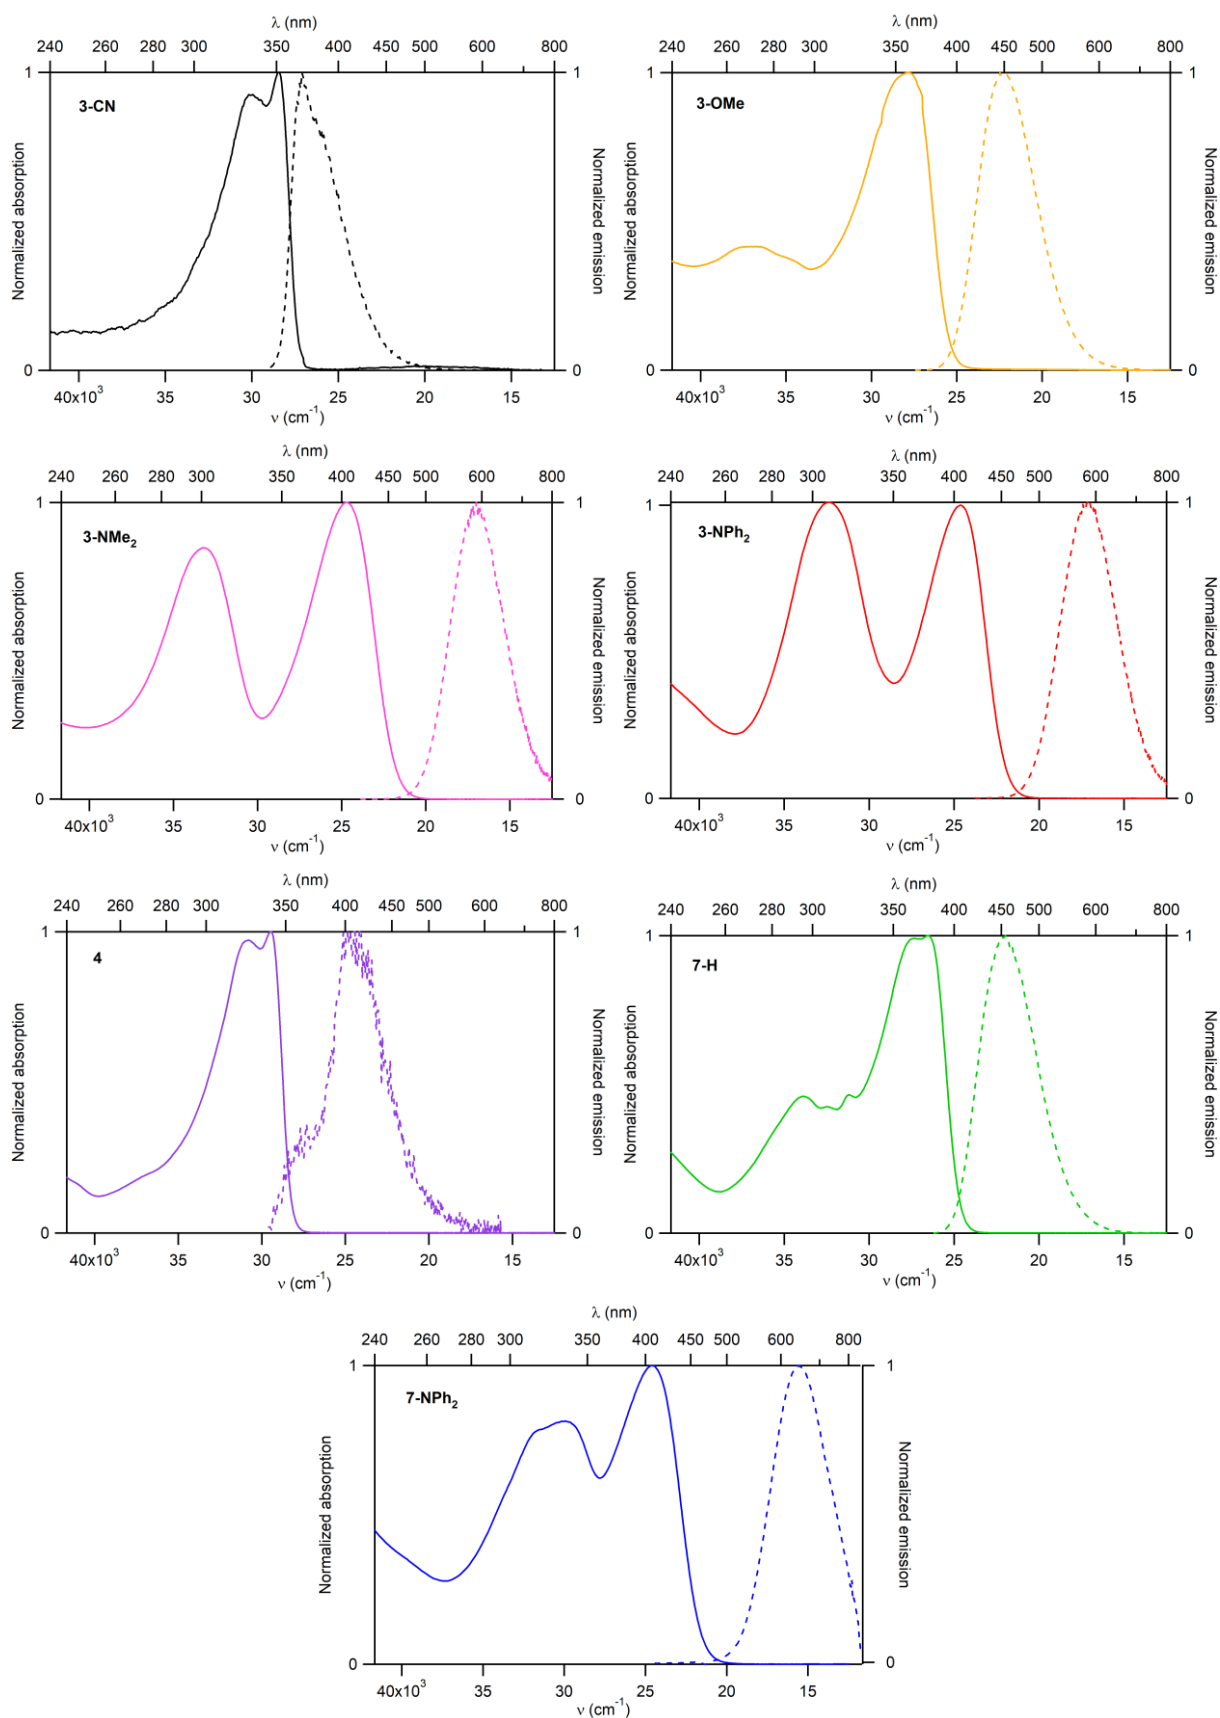

**Figure S7.** Normalized absorption and emission spectra in wavenumber scale (with wavelengths also shown for convenience) of compounds **3-X**, **4** and **7-X** in CH<sub>2</sub>Cl<sub>2</sub> at 298K.

## 4. Two-photon excited fluorescence (2PEF) data for selected 3-X and 7-X derivatives

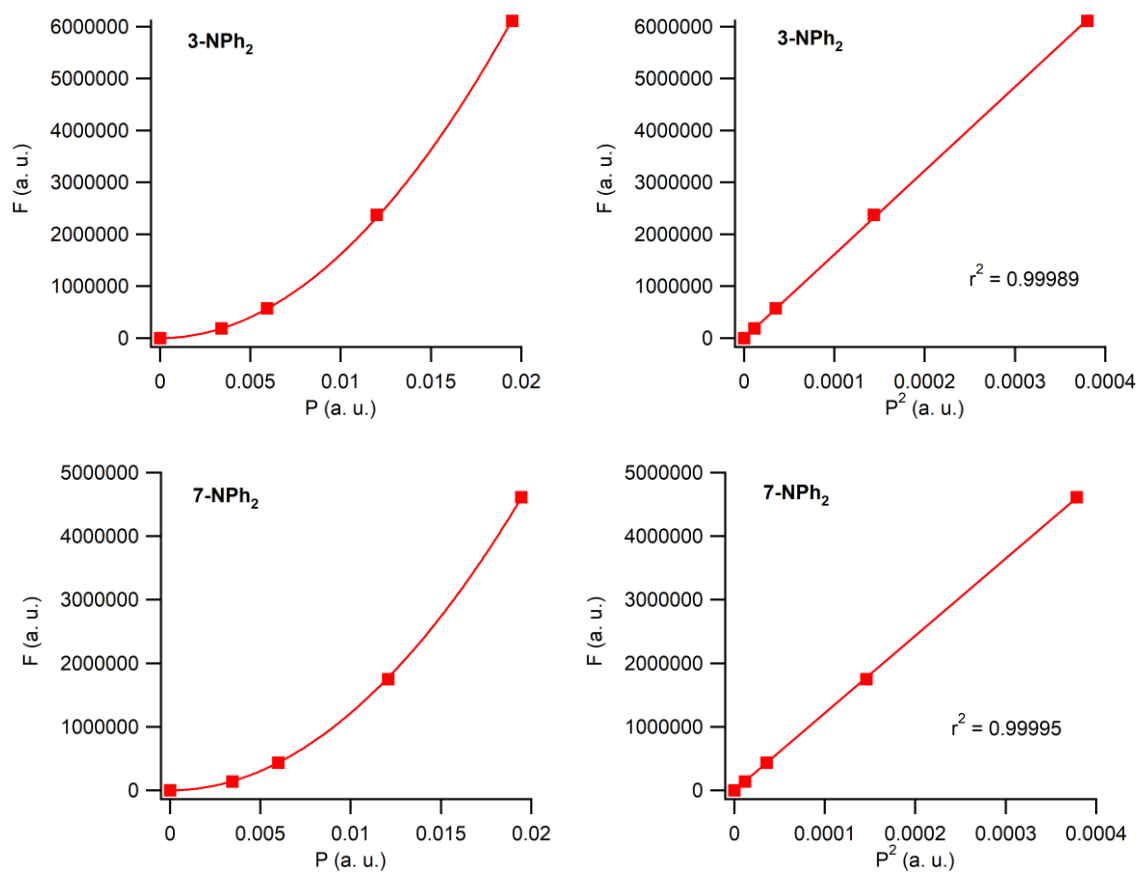

**Figure S8.** Left: quadratic dependence of the emission intensity (F) on laser excitation power (P) for compound 3-NPh<sub>2</sub> and 7-NPh<sub>2</sub> at 700 nm. Right: dependence of F on P<sup>2</sup>.

## Supporting Information

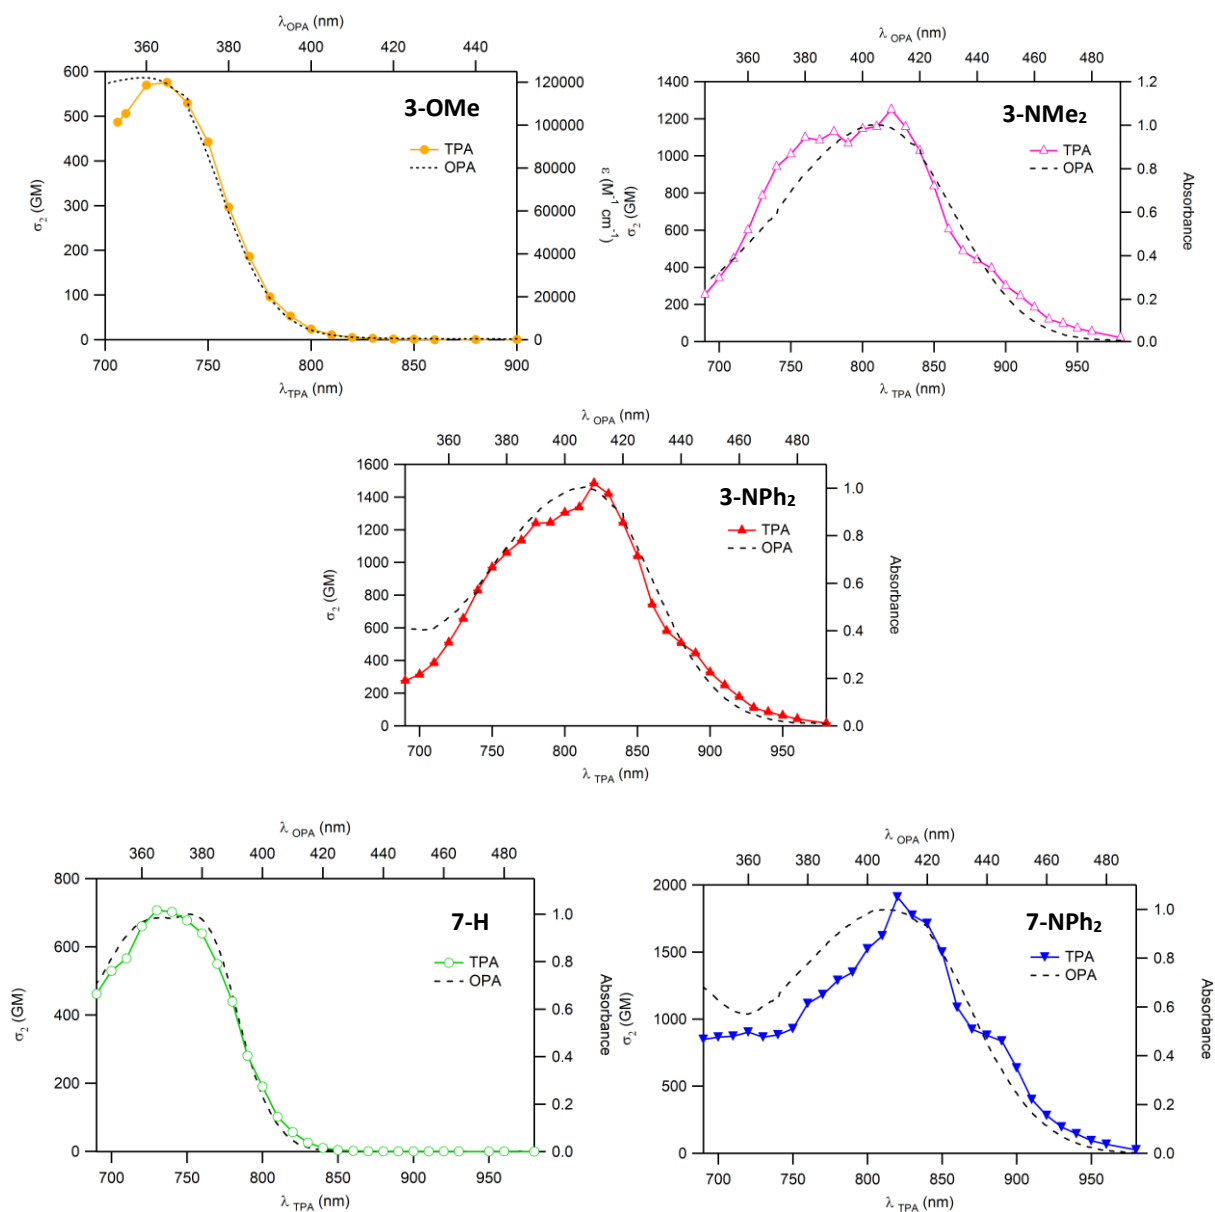

**Figure S9.** Overlay of one- and two-photon absorption spectra for selected **3-X** and **7-X** derivatives in  $\text{CH}_2\text{Cl}_2$  (25 °C).

## 5. Cartesian coordinates of the DFT optimized geometries for 3-X, 4, 7-X and 9a-b/10a-b/11a-b

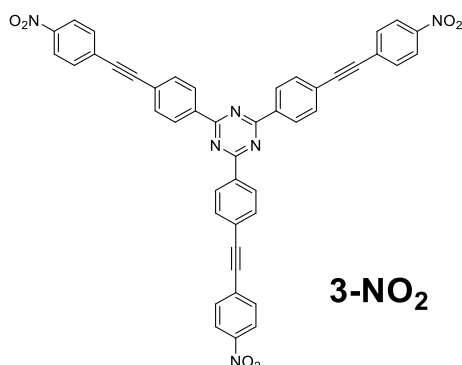

|   |             |             |             |
|---|-------------|-------------|-------------|
| C | 1.28142352  | -0.25484012 | -0.00095799 |
| N | 0.43967907  | -1.29259475 | -0.00091999 |
| C | -0.85999771 | -0.98223076 | -0.00093499 |
| N | -1.33773650 | 0.26562775  | -0.00075999 |
| C | -0.41909168 | 1.23596480  | -0.00076599 |
| N | 0.90049356  | 1.02590092  | -0.00083899 |
| C | -1.83366378 | -2.09251811 | -0.00069799 |
| C | -3.20884532 | -1.82784253 | -0.00077499 |
| C | -1.39217356 | -3.42153282 | -0.00044299 |
| C | -4.12475877 | -2.86575756 | -0.00062499 |
| H | -3.54791290 | -0.79916528 | -0.00101499 |
| C | -2.30201198 | -4.46476782 | -0.00027099 |
| H | -0.32816438 | -3.62393408 | -0.00043599 |
| C | -3.68313451 | -4.20073527 | -0.00034999 |
| H | -5.18835698 | -2.65649630 | -0.00074999 |
| H | -1.95600240 | -5.49205004 | -0.00010799 |
| C | -0.89400328 | 2.63421934  | -0.00056899 |
| C | 0.02257007  | 3.69298238  | -0.00069399 |
| C | -2.26578691 | 2.91603093  | -0.00026899 |
| C | -0.41859407 | 5.00503609  | -0.00055099 |
| H | 1.08298334  | 3.47247809  | -0.00091399 |
| C | -2.71461702 | 4.22550361  | -0.00009399 |
| H | -2.97283452 | 2.09554005  | -0.00015199 |
| C | -1.79558071 | 5.28975566  | -0.00024699 |
| H | 0.29430957  | 5.82161798  | -0.00065399 |
| H | -3.77730926 | 4.43935488  | 0.00015801  |
| C | 2.72976519  | -0.54276630 | -0.00080199 |
| C | 3.65980259  | 0.50420081  | -0.00099199 |
| C | 3.18823938  | -1.86597493 | -0.00044699 |
| C | 5.01823114  | 0.23800814  | -0.00088999 |
| H | 3.30290303  | 1.52681696  | -0.00124999 |
| C | 4.54506297  | -2.14011261 | -0.00028599 |
| H | 2.46692670  | -2.67393289 | -0.00028799 |
| C | 5.48026336  | -1.09005946 | -0.00052699 |
| H | 5.73484080  | 1.05134207  | -0.00107199 |
| H | 4.89567654  | -3.16583379 | 0.00000401  |
| C | -2.25215802 | 6.63415330  | -0.00011099 |
| C | -2.64277127 | 7.78493728  | 0.00003601  |
| C | 6.87276895  | -1.36719095 | -0.00038499 |
| C | 8.06475933  | -1.60392452 | -0.00026799 |
| C | -4.61943981 | -5.26807742 | -0.00022099 |
| C | -5.42119993 | -6.18135384 | -0.00007699 |
| C | -3.09898058 | 9.12839692  | 0.00031701  |
| C | -2.17690626 | 10.19151899 | 0.00019001  |
| C | -4.47787921 | 9.40966347  | 0.00061501  |

|   |              |              |             |
|---|--------------|--------------|-------------|
| C | -2.61952539  | 11.50289266  | 0.00034301  |
| H | -1.11494002  | 9.97729873   | -0.00001399 |
| C | -4.92591732  | 10.71916316  | 0.00086001  |
| H | -5.18950384  | 8.59281457   | 0.00065901  |
| C | -3.98927882  | 11.74831729  | 0.00070501  |
| H | -1.92307181  | 12.33089752  | 0.00023701  |
| H | -5.98264366  | 10.95139344  | 0.00113501  |
| C | 9.45632092   | -1.88053601  | 0.00003001  |
| C | 9.91564317   | -3.21076363  | 0.00216001  |
| C | 10.38965031  | -0.82727088  | -0.00177299 |
| C | 11.27251873  | -3.48350931  | 0.00250201  |
| H | 9.19888751   | -4.02311457  | 0.00350401  |
| C | 11.74764285  | -1.09441956  | -0.00152399 |
| H | 10.03833276  | 0.19753329   | -0.00334700 |
| C | 12.17035408  | -2.42026538  | 0.00063201  |
| H | 11.64114228  | -4.50069340  | 0.00411501  |
| H | 12.47737558  | -0.29564355  | -0.00291500 |
| C | -6.35726125  | -7.24756996  | 0.00010501  |
| C | -5.91255000  | -8.58274866  | 0.00124301  |
| C | -7.73876281  | -6.97948543  | -0.00086099 |
| C | -6.82352541  | -9.62475169  | 0.00137901  |
| H | -4.84949377  | -8.79145194  | 0.00205601  |
| C | -8.65402026  | -8.01767145  | -0.00065999 |
| H | -8.08339838  | -5.95241621  | -0.00188099 |
| C | -8.18288715  | -9.32706202  | 0.00040901  |
| H | -6.49714381  | -10.65629600 | 0.00221601  |
| H | -9.71914236  | -7.82767422  | -0.00142699 |
| N | -9.14350927  | -10.42083229 | 0.00054801  |
| N | -4.45769931  | 13.12649884  | 0.00089501  |
| N | 13.59809573  | -2.70414367  | 0.00096101  |
| O | -10.33415189 | -10.13869673 | -0.00073699 |
| O | -8.71042305  | -11.56523006 | 0.00195301  |
| O | 14.37180764  | -1.75618341  | -0.00275200 |
| O | 13.95040009  | -3.87597486  | 0.00473601  |
| O | -3.61916207  | 14.01762746  | -0.00152899 |
| O | -5.66558145  | 13.32200533  | 0.00360401  |

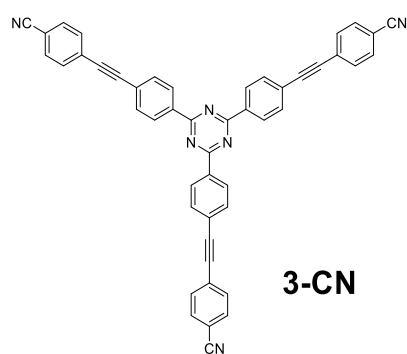

|   |             |             |             |
|---|-------------|-------------|-------------|
| C | -1.14859700 | -0.62682900 | -0.00089400 |
| N | -0.03755800 | -1.36923800 | -0.00094100 |
| C | 1.11240800  | -0.68851300 | -0.00075300 |
| N | 1.19988100  | 0.64488100  | -0.00053400 |
| C | 0.03537000  | 1.30025500  | -0.00052000 |
| N | -1.16307400 | 0.70928300  | -0.00068500 |
| C | 2.37090500  | -1.46108700 | -0.00077000 |
| C | 3.60661900  | -0.80198100 | -0.00041900 |
| C | 2.34288400  | -2.86119800 | -0.00113500 |
| C | 4.78861800  | -1.52257700 | -0.00040700 |

# Supporting Information

|   |              |             |             |
|---|--------------|-------------|-------------|
| H | 3.62656500   | 0.28093200  | -0.00014200 |
| C | 3.52069100   | -3.58861500 | -0.00114900 |
| H | 1.38661800   | -3.36965700 | -0.00142100 |
| C | 4.76215900   | -2.92847400 | -0.00076100 |
| H | 5.74257600   | -1.00774600 | -0.00013100 |
| H | 3.49394300   | -4.67232500 | -0.00144700 |
| C | 0.07557800   | 2.77639300  | -0.00033100 |
| C | -1.11267600  | 3.51754800  | -0.00030400 |
| C | 1.30252300   | 3.45148600  | -0.00018200 |
| C | -1.07876400  | 4.90142500  | -0.00014800 |
| H | -2.06085000  | 2.99409600  | -0.00041000 |
| C | 1.34445500   | 4.83517100  | -0.00001900 |
| H | 2.22055400   | 2.87676500  | -0.00019200 |
| C | 0.15237300   | 5.58083600  | -0.00001600 |
| H | -2.00124700  | 5.47075500  | -0.00012500 |
| H | 2.29670500   | 5.35310000  | 0.00010300  |
| C | -2.44746600  | -1.32938500 | -0.00097300 |
| C | -3.64488100  | -0.60312700 | -0.00084300 |
| C | -2.49656600  | -2.72895000 | -0.00114600 |
| C | -4.86480900  | -1.25748500 | -0.00085900 |
| H | -3.60477900  | 0.47927400  | -0.00071500 |
| C | -3.71277500  | -3.39030600 | -0.00116900 |
| H | -1.56963800  | -3.28922900 | -0.00125400 |
| C | -4.91598500  | -2.66271300 | -0.00100400 |
| H | -5.78894300  | -0.69090100 | -0.00075100 |
| H | -3.74562900  | -4.47384800 | -0.00130100 |
| C | 0.19083100   | 7.00040000  | 0.00018100  |
| C | 0.22385700   | 8.21516800  | 0.00031300  |
| C | -6.16569200  | -3.33725600 | -0.00103600 |
| C | -7.23565200  | -3.91339900 | -0.00087900 |
| C | 5.97261900   | -3.67101100 | -0.00079000 |
| C | 7.00884700   | -4.30583200 | -0.00074700 |
| C | 0.26533700   | 9.63429700  | 0.00005500  |
| C | -0.92738700  | 10.37941300 | -0.00013700 |
| C | 1.49902200   | 10.30943700 | 0.00009400  |
| C | -0.88952300  | 11.76281100 | -0.00031400 |
| H | -1.87943000  | 9.86212300  | -0.00014500 |
| C | 1.54090600   | 11.69276300 | -0.00007900 |
| H | 2.41972800   | 9.73815700  | 0.00027200  |
| C | 0.34581600   | 12.42573500 | -0.00028800 |
| H | -1.80964100  | 12.33506800 | -0.00046700 |
| H | 2.49243400   | 12.21115400 | -0.00005100 |
| C | -8.48639200  | -4.58538500 | 0.00030500  |
| C | -8.53838600  | -5.99071900 | 0.00060400  |
| C | -9.68649700  | -3.85220000 | 0.00112400  |
| C | -9.75685700  | -6.64706200 | 0.00170000  |
| H | -7.61560700  | -6.55855600 | -0.00004000 |
| C | -10.90682800 | -4.50501300 | 0.00222500  |
| H | -9.64988400  | -2.76926400 | 0.00088300  |
| C | -10.94710100 | -5.90635500 | 0.00253200  |
| H | -9.79448100  | -7.73004500 | 0.00192800  |
| H | -11.83021200 | -3.93808400 | 0.00286000  |
| C | 8.22002900   | -5.04664400 | -0.00023500 |
| C | 8.19367800   | -6.45263200 | -0.00067400 |
| C | 9.45906900   | -4.38123800 | 0.00061100  |
| C | 9.37380700   | -7.17561700 | -0.00025500 |
| H | 7.24082300   | -6.96849400 | -0.00136500 |
| C | 10.64124400  | -5.10075400 | 0.00104600  |
| H | 9.48236800   | -3.29794500 | 0.00092200  |
| C | 10.60344800  | -6.50223900 | 0.00062100  |
| H | 9.35168200   | -8.25897900 | -0.00060300 |
| H | 11.59449700  | -4.58554300 | 0.00171400  |
| C | -12.20618000 | -6.58231400 | 0.00369900  |
| C | 0.38714000   | 13.85423300 | -0.00045700 |
| C | 11.82296400  | -7.24734000 | 0.00105600  |
| N | -13.22933900 | -7.13194600 | 0.00464100  |

|   |             |             |             |
|---|-------------|-------------|-------------|
| N | 12.81436200 | -7.85238300 | 0.00140300  |
| N | 0.42098100  | 15.01518500 | -0.00059100 |

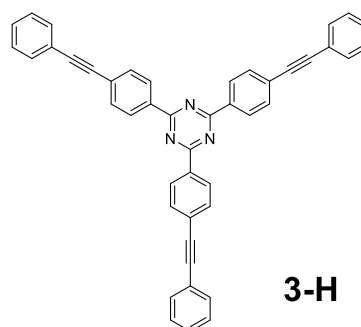

|   |             |             |             |
|---|-------------|-------------|-------------|
| C | -1.14405100 | -0.63164600 | 0.00003200  |
| N | -1.16846400 | 0.70476700  | 0.00002300  |
| C | 0.02583100  | 1.30496400  | -0.00001400 |
| N | 1.19538300  | 0.65785300  | -0.00003900 |
| C | 1.11796600  | -0.67656300 | -0.00002200 |
| N | -0.02717200 | -1.36595500 | 0.00001200  |
| C | 0.05509100  | 2.78040300  | -0.00002900 |
| C | 1.27634000  | 3.46613600  | -0.00018400 |
| C | -1.13797900 | 3.51410700  | 0.00011200  |
| C | 1.30759000  | 4.85006600  | -0.00020300 |
| H | 2.19902200  | 2.89858200  | -0.00029200 |
| C | -1.11420200 | 4.89818800  | 0.00010200  |
| H | -2.08253400 | 2.98372300  | 0.00023200  |
| C | 0.11091500  | 5.58926400  | -0.00005700 |
| H | 2.25637700  | 5.37466100  | -0.00032800 |
| H | -2.04135900 | 5.46011300  | 0.00021700  |
| C | 2.38119700  | -1.43939900 | -0.00003600 |
| C | 2.36494700  | -2.83990400 | -0.00000600 |
| C | 3.61283000  | -0.77252300 | -0.00007800 |
| C | 3.54815100  | -3.55842500 | -0.00001700 |
| H | 1.41229900  | -3.35557200 | 0.00002600  |
| C | 4.79989300  | -1.48462100 | -0.00008900 |
| H | 3.62508800  | 0.31068000  | -0.00010000 |
| C | 4.78639000  | -2.89114700 | -0.00005900 |
| H | 3.52853500  | -4.64239900 | 0.00000700  |
| H | 5.74987000  | -0.96219600 | -0.00012200 |
| C | -2.43656100 | -1.34373500 | 0.00006200  |
| C | -2.47582400 | -2.74377400 | 0.00006000  |
| C | -3.64077500 | -0.62853000 | 0.00009100  |
| C | -3.68657200 | -3.41482700 | 0.00008500  |
| H | -1.54435200 | -3.29677700 | 0.00003900  |
| C | -4.85513200 | -1.29301700 | 0.00011600  |
| H | -3.61004200 | 0.45431400  | 0.00009200  |
| C | -4.89737400 | -2.69897600 | 0.00011300  |
| H | -3.70997700 | -4.49872600 | 0.00008300  |
| H | -5.78366200 | -0.73336200 | 0.00013900  |
| C | 6.00228000  | -3.62504600 | -0.00006900 |
| C | 7.04292200  | -4.25338200 | -0.00007900 |
| C | -6.14138000 | -3.38413800 | 0.00013600  |
| C | -7.20606500 | -3.97082300 | 0.00015500  |
| C | 0.13909200  | 7.00919000  | -0.00007300 |
| C | 0.16314900  | 8.22457600  | -0.00008400 |
| C | 8.26097100  | -4.98792700 | -0.00010200 |
| C | 8.24460300  | -6.39335100 | -0.00006800 |
| C | 9.49614700  | -4.31724100 | -0.00015800 |
| C | 9.43670700  | -7.10567200 | -0.00009000 |
| H | 7.29297200  | -6.91341800 | -0.00002400 |
| C | 10.68268500 | -5.03877300 | -0.00017900 |
| H | 9.51167000  | -3.23288600 | -0.00018400 |

## Supporting Information

|   |              |             |             |
|---|--------------|-------------|-------------|
| C | 10.65746300  | -6.43258100 | -0.00014600 |
| H | 9.41355500   | -8.19043800 | -0.00006300 |
| H | 11.63112000  | -4.51177200 | -0.00022300 |
| C | -8.45183900  | -4.65729700 | 0.00018000  |
| C | -9.66006900  | -3.93921300 | 0.00020500  |
| C | -8.48997100  | -6.06230200 | 0.00018100  |
| C | -10.87368400 | -4.61422100 | 0.00022900  |
| H | -9.63352800  | -2.85507000 | 0.00020500  |
| C | -9.70877000  | -6.72788400 | 0.00020500  |
| H | -7.55920600  | -6.61884400 | 0.00016200  |
| C | -10.90251400 | -6.00796100 | 0.00022900  |
| H | -11.80097300 | -4.05085200 | 0.00024800  |
| H | -9.72768600  | -7.81273100 | 0.00020500  |
| C | 0.19097100   | 9.64669700  | -0.00007900 |
| C | -1.00702900  | 10.38173600 | 0.00030900  |
| C | 1.41668300   | 10.33451500 | -0.00046300 |
| C | -0.97462400  | 11.77006300 | 0.00031200  |
| H | -1.95417600  | 9.85354200  | 0.00060600  |
| C | 1.43832600   | 11.72306200 | -0.00045900 |
| H | 2.34253600   | 9.76983400  | -0.00076300 |
| C | 0.24544100   | 12.44440300 | -0.00007200 |
| H | -1.90489100  | 12.32850200 | 0.00061400  |
| H | 2.38963600   | 12.24485900 | -0.00075800 |
| H | 11.58665800  | -6.99275500 | -0.00016300 |
| H | 0.26657500   | 13.52918500 | -0.00006900 |
| H | -11.85274100 | -6.53167500 | 0.00024800  |

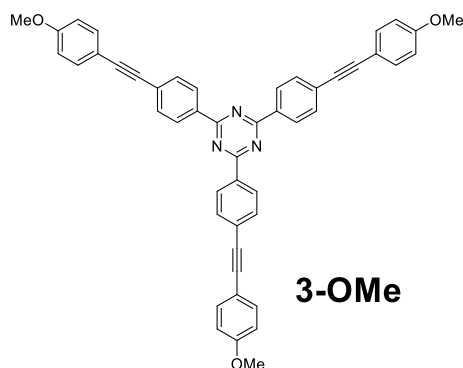

|   |             |             |             |
|---|-------------|-------------|-------------|
| C | -1.31088200 | -0.33137900 | -0.00025000 |
| N | -0.43199500 | -1.33874800 | -0.00019700 |
| C | 0.85652800  | -0.98258100 | -0.00022400 |
| N | 1.28969700  | 0.28219600  | -0.00027200 |
| C | 0.33682700  | 1.21993800  | -0.00025800 |
| N | -0.97515800 | 0.96271700  | -0.00027700 |
| C | 1.86735100  | -2.05684700 | -0.00019400 |
| C | 3.23359400  | -1.74762800 | -0.00007500 |
| C | 1.47516400  | -3.40164700 | -0.00027300 |
| C | 4.18469000  | -2.75317900 | -0.00003200 |
| H | 3.53779800  | -0.70790100 | 0.00000300  |
| C | 2.42062100  | -4.41246800 | -0.00023100 |
| H | 0.41872100  | -3.64153600 | -0.00036700 |
| C | 3.79379400  | -4.10495300 | -0.00011000 |
| H | 5.24028200  | -2.50568300 | 0.00006700  |
| H | 2.10901200  | -5.45093600 | -0.00028800 |
| C | 0.76155100  | 2.63254800  | -0.00020800 |
| C | -0.18956600 | 3.66094000  | 0.00084100  |
| C | 2.12220300  | 2.96561900  | -0.00117700 |
| C | 0.20534500  | 4.98750600  | 0.00093500  |
| H | -1.24201500 | 3.40420400  | 0.00161600  |
| C | 2.52451400  | 4.28993000  | -0.00113200 |
| H | 2.85837700  | 2.17087500  | -0.00198900 |
| C | 1.57139800  | 5.32516800  | -0.00006300 |

|   |              |              |             |
|---|--------------|--------------|-------------|
| H | -0.53697000  | 5.77774700   | 0.00178900  |
| H | 3.57961500   | 4.53953300   | -0.00192300 |
| C | -2.74637200  | -0.67097300  | -0.00029800 |
| C | -3.71664700  | 0.33940900   | -0.00086500 |
| C | -3.15957200  | -2.00950500  | 0.00023600  |
| C | -5.06427500  | 0.02365800   | -0.00088500 |
| H | -3.39846900  | 1.37493400   | -0.00130500 |
| C | -4.50538000  | -2.33272000  | 0.00024500  |
| H | -2.40994600  | -2.79162300  | 0.00066000  |
| C | -5.48232600  | -1.31995300  | -0.00031100 |
| H | -5.80910600  | 0.81154600   | -0.00134100 |
| H | -4.81708100  | -3.37116000  | 0.00068400  |
| C | 1.98046700   | 6.68418400   | 0.00002500  |
| C | 2.33258400   | 7.84855000   | 0.00010600  |
| C | -6.86321900  | -1.64768400  | -0.00027700 |
| C | -8.04682000  | -1.92845000  | -0.00020500 |
| C | 4.76603000   | -5.13889400  | -0.00005800 |
| C | 5.59956800   | -6.02486200  | -0.00002000 |
| C | 2.74081400   | 9.20832500   | 0.00018600  |
| C | 1.78935000   | 10.24743500  | 0.00099400  |
| C | 4.10081100   | 9.55161800   | -0.00053300 |
| C | 2.18793500   | 11.56959900  | 0.00107100  |
| H | 0.73307100   | 10.00195700  | 0.00154700  |
| C | 4.50879200   | 10.87928600  | -0.00045700 |
| H | 4.84717900   | 8.76479500   | -0.00116700 |
| C | 3.55106000   | 11.89868300  | 0.00035000  |
| H | 1.45937600   | 12.37274300  | 0.00168600  |
| H | 5.56736900   | 11.10711300  | -0.00103100 |
| C | -9.42736000  | -2.25977700  | -0.00006700 |
| C | -9.84618100  | -3.60500400  | 0.00053200  |
| C | -10.40861400 | -1.25749900  | -0.00051400 |
| C | -11.18922600 | -3.92630500  | 0.00070500  |
| H | -9.10226500  | -4.39403900  | 0.00086500  |
| C | -11.76114600 | -1.57346600  | -0.00034900 |
| H | -10.10450700 | -0.21650400  | -0.00100000 |
| C | -12.15976900 | -2.91417900  | 0.00028600  |
| H | -11.51636100 | -4.96014100  | 0.00117700  |
| H | -12.49114300 | -0.77368000  | -0.00074300 |
| C | 6.57039200   | -7.06079600  | 0.00004600  |
| C | 6.18087800   | -8.41479800  | -0.00010500 |
| C | 7.94103800   | -6.76284300  | 0.00026200  |
| C | 7.12628900   | -9.42135600  | -0.00002500 |
| H | 5.12572500   | -8.66505000  | -0.00027700 |
| C | 8.89729500   | -7.77017200  | 0.00034100  |
| H | 8.25921000   | -5.72605200  | 0.00037000  |
| C | 8.49339800   | -9.10927100  | 0.00020500  |
| H | 6.83131200   | -10.46481800 | -0.00013200 |
| H | 9.94670100   | -7.50339400  | 0.00050100  |
| O | -13.44383200 | -3.33145500  | 0.00053900  |
| O | 3.83678300   | 13.21827100  | 0.00050700  |
| O | 9.33670200   | -10.16370700 | 0.00025400  |
| C | 10.73010300  | -9.90746600  | 0.00058000  |
| H | 11.03267400  | -9.35288800  | 0.89488500  |
| H | 11.21255400  | -10.88382500 | 0.00066000  |
| H | 11.03308600  | -9.35283200  | -0.89355200 |
| C | -14.46685900 | -2.35138000  | 0.00036100  |
| H | -15.40668200 | -2.90161500  | 0.00095400  |
| H | -14.41453100 | -1.72121100  | 0.89422200  |
| H | -14.41510000 | -1.72217700  | -0.89421100 |
| C | 5.19853700   | 13.60911900  | -0.00018600 |
| H | 5.71592300   | 13.24748800  | -0.89480100 |
| H | 5.19594300   | 14.69816800  | 0.00007800  |
| H | 5.71696300   | 13.24707100  | 0.89365900  |

# Supporting Information

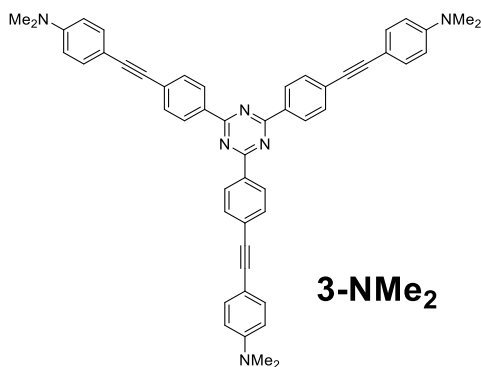

|   |              |             |             |
|---|--------------|-------------|-------------|
| C | 0.25163733   | 1.27991140  | -0.00075897 |
| N | 1.29105280   | 0.43852477  | -0.00076897 |
| C | 0.98257558   | -0.86268094 | -0.00107597 |
| N | -0.26575402  | -1.34228050 | -0.00128197 |
| C | -1.23839089  | -0.42447851 | -0.00117297 |
| N | -1.02947377  | 0.89640168  | -0.00089397 |
| C | 2.09251673   | -1.83276122 | -0.00114697 |
| C | 1.83491790   | -3.21008267 | -0.00205497 |
| C | 3.42283853   | -1.39273224 | -0.00024397 |
| C | 2.87435275   | -4.12354131 | -0.00203697 |
| H | 0.80698161   | -3.55239707 | -0.00277997 |
| C | 4.46748235   | -2.30016185 | -0.00016897 |
| H | 3.62406198   | -0.32815110 | 0.00046003  |
| C | 4.21253257   | -3.68508228 | -0.00105397 |
| H | 2.66514730   | -5.18748048 | -0.00274597 |
| H | 5.49373759   | -1.95012446 | 0.00059303  |
| C | -2.63367451  | -0.90018884 | -0.00103397 |
| C | -3.69709635  | 0.01223968  | -0.00061197 |
| C | -2.91877136  | -2.27209443 | -0.00127297 |
| C | -5.00819814  | -0.43022421 | -0.00043197 |
| H | -3.47883288  | 1.07344390  | -0.00039097 |
| C | -4.22731411  | -2.72212230 | -0.00109097 |
| H | -2.09814360  | -2.97942320 | -0.00159297 |
| C | -5.29857295  | -1.80815383 | -0.00064997 |
| H | -5.82446295  | 0.28353258  | -0.00011597 |
| H | -4.43798757  | -3.78577148 | -0.00127297 |
| C | 0.53696179   | 2.72620900  | -0.00060697 |
| C | -0.50902016  | 3.65861061  | -0.00075397 |
| C | 1.85865646   | 3.19159494  | -0.00033497 |
| C | -0.24513124  | 5.01698309  | -0.00061797 |
| H | -1.53177937  | 3.30114224  | -0.00099097 |
| C | 2.13034939   | 4.54842547  | -0.00020197 |
| H | 2.66910128   | 2.47259012  | -0.00023897 |
| C | 1.08180241   | 5.48836708  | -0.00032897 |
| H | -1.06125803  | 5.73089287  | -0.00074997 |
| H | 3.15644264   | 4.89894886  | -0.00000397 |
| C | -6.64037468  | -2.26542987 | -0.00039297 |
| C | -7.79317070  | -2.65861493 | -0.00008497 |
| C | 1.35631516   | 6.87910759  | -0.00020297 |
| C | 1.59263094   | 8.07397490  | -0.00009497 |
| C | 5.28023652   | -4.61757478 | -0.00089397 |
| C | 6.19807579   | -5.41827506 | -0.00066397 |
| C | -9.13381744  | -3.11536997 | 0.00012303  |
| C | -10.21243324 | -2.21210253 | 0.00060403  |
| C | -9.43701627  | -4.48918365 | -0.00005697 |
| C | -11.52207306 | -2.65163541 | 0.00089503  |
| H | -10.01034278 | -1.14606939 | 0.00080603  |
| C | -10.74276203 | -4.94020551 | 0.00023503  |
| H | -8.62637446  | -5.21038347 | -0.00044897 |
| C | -11.82954086 | -4.03331312 | 0.00068103  |
| H | -12.31623894 | -1.91594150 | 0.00141803  |

|   |              |              |             |
|---|--------------|--------------|-------------|
| H | -10.92279845 | -6.00768851  | -0.00002297 |
| C | 1.86722070   | 9.46341946   | 0.00007903  |
| C | 3.18867428   | 9.94616739   | 0.00022403  |
| C | 0.82885766   | 10.41267111  | 0.00013803  |
| C | 3.46256722   | 11.30018793  | 0.00041503  |
| H | 4.01098704   | 9.23831064   | 0.00019703  |
| C | 1.09083759   | 11.76905061  | 0.00032803  |
| H | -0.20095264  | 10.07097072  | 0.00007903  |
| C | 2.41952315   | 12.25707459  | 0.00043403  |
| H | 4.49673463   | 11.62021835  | 0.00049203  |
| H | 0.25627393   | 12.45856925  | 0.00046603  |
| C | 7.26619271   | -6.34837753  | -0.00015597 |
| C | 8.60634759   | -5.92028652  | 0.00172003  |
| C | 7.02712794   | -7.73478588  | -0.00147897 |
| C | 9.65239136   | -6.82256109  | 0.00229003  |
| H | 8.82251803   | -4.85701829  | 0.00275203  |
| C | 8.06520977   | -8.64624956  | -0.00094497 |
| H | 6.00389176   | -8.09567228  | -0.00292597 |
| C | 9.41431965   | -8.21788243  | 0.00099103  |
| H | 10.66579045  | -6.44187780  | 0.00371503  |
| H | 7.82814429   | -9.70253286  | -0.00195597 |
| N | 2.68452816   | 13.59784707  | 0.00055203  |
| N | -13.12330965 | -4.47381691  | 0.00085503  |
| N | 10.44532542  | -9.11511516  | 0.00163503  |
| C | 1.59724909   | 14.55243547  | 0.00055203  |
| H | 2.00746285   | 15.56118669  | -0.00021897 |
| H | 0.96232760   | 14.44517214  | -0.88746603 |
| H | 0.96296859   | 14.44616514  | 0.88917310  |
| C | 4.05319682   | 14.06705626  | 0.00176003  |
| H | 4.05752913   | 15.15602536  | 0.00231003  |
| H | 4.59884063   | 13.72647207  | 0.89031510  |
| H | 4.60012563   | 13.72737109  | -0.88634604 |
| C | 10.17091283  | -10.53572768 | -0.00073597 |
| H | 9.60482234   | -10.83879167 | -0.89008703 |
| H | 11.11307672  | -11.08183182 | -0.00056897 |
| H | 9.60298335   | -10.84143068 | 0.88654310  |
| C | 11.81441105  | -8.64710794  | 0.00388303  |
| H | 12.03613092  | -8.04373173  | 0.89269810  |
| H | 12.48533059  | -9.50483049  | 0.00480903  |
| H | 12.03906092  | -8.04330172  | -0.88392904 |
| C | -13.40685922 | -5.89260648  | 0.00255703  |
| H | -12.99647364 | -6.38806841  | 0.89101110  |
| H | -14.48563255 | -6.04121913  | 0.00371603  |
| H | -12.99815261 | -6.38988339  | -0.88566003 |
| C | -14.21373869 | -3.52282454  | 0.00121803  |
| H | -14.19138603 | -2.87865437  | -0.88634104 |
| H | -15.15906696 | -4.06340451  | -0.00033097 |
| H | -14.19296504 | -2.88066338  | 0.89032610  |

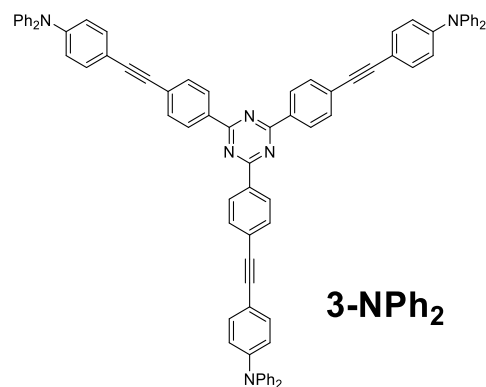

## Supporting Information

|   |             |              |             |   |              |              |             |
|---|-------------|--------------|-------------|---|--------------|--------------|-------------|
| C | -0.71014600 | -1.09573200  | -0.01040000 | C | -5.76270500  | 8.70296800   | -0.10328600 |
| N | -1.35965700 | 0.07277600   | -0.02261400 | C | -3.61173100  | 9.79350300   | -0.12143500 |
| C | -0.58735200 | 1.16405500   | -0.02241000 | C | -6.38939500  | 9.93599900   | -0.12251600 |
| N | 0.74937500  | 1.14227800   | -0.00999300 | H | -6.36046500  | 7.79800700   | -0.10179100 |
| C | 1.30817900  | -0.07223500  | 0.00212100  | C | -4.23622100  | 11.02778000  | -0.12982500 |
| N | 0.62101500  | -1.21908300  | 0.00196400  | H | -2.52848700  | 9.74102000   | -0.11204900 |
| C | -1.25450600 | 2.47947900   | -0.03697000 | C | -5.63798900  | 11.12318100  | -0.13341500 |
| C | -0.49966200 | 3.65966300   | -0.04250700 | H | -7.47191100  | 9.98717600   | -0.13621600 |
| C | -2.65265900 | 2.56756800   | -0.04570200 | H | -3.63783400  | 11.93143100  | -0.12660500 |
| C | -1.12220500 | 4.89566100   | -0.05644800 | N | -7.59027600  | -11.61296000 | 0.00426600  |
| H | 0.58158100  | 3.59277200   | -0.03585800 | N | 13.85640000  | -0.75771200  | 0.15424200  |
| C | -3.28216600 | 3.80004300   | -0.05926400 | N | -6.27154400  | 12.37262500  | -0.14704300 |
| H | -3.23757300 | 1.65569700   | -0.04160500 | C | -5.67702900  | 13.47600600  | -0.81048800 |
| C | -2.52656800 | 4.98737800   | -0.06497900 | C | -5.63994300  | 14.73052100  | -0.19244800 |
| H | -0.53080400 | 5.80437600   | -0.06075500 | C | -5.13606800  | 13.32738400  | -2.09247700 |
| H | -4.36472100 | 3.85969800   | -0.06576600 | C | -5.07459600  | 15.81705900  | -0.85074100 |
| C | 2.78088500  | -0.15196900  | 0.01734000  | H | -6.05522300  | 14.84760200  | 0.80270500  |
| C | 3.42577300  | -1.39562100  | 0.02589500  | C | -4.55644100  | 14.41516200  | -2.73598700 |
| C | 3.55583200  | 1.01505500   | 0.02413800  | H | -5.17420200  | 12.35920200  | -2.58014100 |
| C | 4.80744100  | -1.47406800  | 0.04085900  | C | -4.52564100  | 15.66575500  | -2.12230000 |
| H | 2.82744200  | -2.29870000  | 0.02070400  | H | -5.05264000  | 16.78447600  | -0.35927700 |
| C | 4.93794100  | 0.94442100   | 0.03959900  | H | -4.14074100  | 14.28553800  | -3.73012400 |
| H | 3.05800100  | 1.97723100   | 0.01755100  | H | -4.07948300  | 16.51399500  | -2.63052200 |
| C | 5.58870300  | -0.30347000  | 0.04829800  | C | -7.51834400  | 12.55650300  | 0.50317000  |
| H | 5.29894700  | -2.44045900  | 0.04741800  | C | -8.54703700  | 13.25742300  | -0.13531300 |
| H | 5.53060100  | 1.85230000   | 0.04522800  | C | -7.72876000  | 12.05408300  | 1.79216300  |
| C | -1.51602100 | -2.33099900  | -0.00993600 | C | -9.76294800  | 13.45467700  | 0.50978900  |
| C | -0.89372200 | -3.58606900  | -0.00093500 | H | -8.38782700  | 13.64470700  | -1.13588700 |
| C | -2.91541200 | -2.26666600  | -0.01817400 | C | -8.95402400  | 12.24024900  | 2.42256500  |
| C | -1.64686000 | -4.74721800  | -0.00031400 | H | -6.92935800  | 11.52093600  | 2.29552200  |
| H | 0.18844000  | -3.63672500  | 0.00562800  | C | -9.97586300  | 12.94399700  | 1.78846000  |
| C | -3.67509100 | -3.42348100  | -0.01719200 | H | -10.55216400 | 14.00033700  | 0.00253400  |
| H | -3.39730100 | -1.29644500  | -0.02514800 | H | -9.10331600  | 11.84521500  | 3.42234900  |
| C | -3.05289800 | -4.68586300  | -0.00828600 | H | -10.92788700 | 13.09402900  | 2.28645300  |
| H | -1.15771700 | -5.71480300  | 0.00663700  | C | -7.12255900  | -12.78374600 | -0.64499400 |
| H | -4.75772800 | -3.36519600  | -0.02335000 | C | -7.22312100  | -14.02654600 | -0.01063700 |
| C | 7.00525700  | -0.38028500  | 0.06479900  | C | -6.57067800  | -12.71231200 | -1.92893900 |
| C | 8.22019300  | -0.44750500  | 0.07972100  | C | -6.78232500  | -15.17726800 | -0.65489900 |
| C | -3.82872400 | -5.87367000  | -0.00698800 | H | -7.64710100  | -14.08415900 | 0.98606600  |
| C | -4.49543500 | -6.89166200  | -0.00552200 | C | -6.11589200  | -13.86565700 | -2.55845600 |
| C | -3.16819900 | 6.25265000   | -0.07890700 | H | -6.50244500  | -11.75219100 | -2.42911000 |
| C | -3.71850800 | 7.33792600   | -0.09084300 | C | -6.22223300  | -15.10395500 | -1.92848800 |
| C | 9.63617800  | -0.52541200  | 0.09783100  | H | -6.86642800  | -16.13475500 | -0.15085900 |
| C | 10.29265300 | -1.76916300  | 0.09698700  | H | -5.69015100  | -13.79556100 | -3.55431800 |
| C | 10.42486800 | 0.63883900   | 0.11773000  | H | -5.87336700  | -16.00277500 | -2.42575000 |
| C | 11.67357700 | -1.84639600  | 0.12066300  | C | -8.84892700  | -11.64938300 | 0.65664900  |
| H | 9.70494800  | -2.68066800  | 0.09286900  | C | -9.94956600  | -12.24062800 | 0.02723100  |
| C | 11.80605700 | 0.56414800   | 0.13056900  | C | -9.00078600  | -11.11045800 | 1.93910400  |
| H | 9.94079300  | 1.60932400   | 0.10773900  | C | -11.17887600 | -12.29439100 | 0.67486500  |
| C | 12.45772100 | -0.68064200  | 0.13524900  | H | -9.83546500  | -12.65594000 | -0.96824700 |
| H | 12.15608800 | -2.81677000  | 0.13525200  | C | -10.23819400 | -11.15234200 | 2.57189900  |
| H | 12.39234400 | 1.47569600   | 0.13018300  | H | -8.14669800  | -10.66249200 | 2.43560900  |
| C | -5.27287600 | -8.07783200  | -0.00354300 | C | -11.33233000 | -11.74711600 | 1.94689400  |
| C | -6.67815500 | -8.02197800  | 0.00022200  | H | -12.02417300 | -12.75613600 | 0.17468300  |
| C | -4.66122400 | -9.34421900  | -0.00502200 | H | -10.34157600 | -10.73057100 | 3.56655000  |
| C | -7.43759200 | -9.17812000  | -0.00277200 | H | -12.29437700 | -11.78489500 | 2.44679100  |
| H | -7.17195600 | -7.05641100  | -0.00973900 | C | 14.52905200  | -1.82514800  | -0.49323500 |
| C | -5.41858400 | -10.50172500 | 0.00282800  | C | 15.58133900  | -2.48546200  | 0.15002200  |
| H | -3.57881300 | -9.41205800  | 0.00297500  | C | 14.16004300  | -2.21900800  | -1.78433100 |
| C | -6.82229900 | -10.44129800 | 0.00148500  | C | 16.25435200  | -3.51874200  | -0.49257200 |
| H | -8.51913900 | -9.10910600  | -0.01539700 | H | 15.86696200  | -2.18459400  | 1.15222200  |
| H | -4.92398100 | -11.46599100 | 0.01716900  | C | 14.82660700  | -3.26528900  | -2.41228400 |
| C | -4.35989800 | 8.60276900   | -0.10513200 | H | 13.35290300  | -1.70117400  | -2.29131700 |
|   |             |              |             | C | 15.87889400  | -3.91808900  | -1.77346900 |
|   |             |              |             | H | 17.06890700  | -4.02211700  | 0.01833500  |
|   |             |              |             | H | 14.52996900  | -3.56014700  | -3.41377200 |

# Supporting Information

|   |             |             |             |
|---|-------------|-------------|-------------|
| H | 16.40178900 | -4.72888300 | -2.26950500 |
| C | 14.62466600 | 0.22971300  | 0.82193100  |
| C | 15.76204300 | 0.76740900  | 0.21002700  |
| C | 14.26469500 | 0.66511400  | 2.10218000  |
| C | 16.52695900 | 1.72094100  | 0.87275000  |
| H | 16.04124400 | 0.43424300  | -0.78372100 |
| C | 15.02506800 | 1.63227600  | 2.75008400  |
| H | 13.39068400 | 0.24145200  | 2.58515500  |
| C | 16.16140900 | 2.16255900  | 2.14258500  |
| H | 17.40687100 | 2.12939700  | 0.38609400  |
| H | 14.73429400 | 1.96059200  | 3.74284300  |
| H | 16.75668000 | 2.91133500  | 2.65429200  |

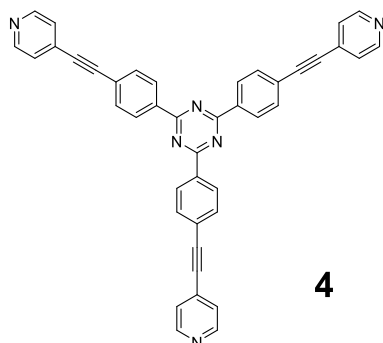

**4**

|   |             |             |             |
|---|-------------|-------------|-------------|
| C | 0.76806700  | -1.05152100 | -0.04674800 |
| N | 1.35529400  | 0.14881500  | -0.04640400 |
| C | 0.52671400  | 1.19714400  | -0.04653100 |
| N | -0.80640700 | 1.10558800  | -0.04708000 |
| C | -1.30005300 | -0.13615700 | -0.04607500 |
| N | -0.55412400 | -1.24477200 | -0.04684100 |
| C | 1.12427600  | 2.54737600  | -0.04025900 |
| C | 0.30867000  | 3.68212200  | 0.05040600  |
| C | 2.51319100  | 2.70730300  | -0.12067600 |
| C | 0.86574300  | 4.94937100  | 0.06407500  |
| H | -0.76534500 | 3.55605300  | 0.11285700  |
| C | 3.07717800  | 3.97146800  | -0.11118800 |
| H | 3.14222100  | 1.82828500  | -0.19049300 |
| C | 2.26004500  | 5.11189200  | -0.01654100 |
| H | 0.23082800  | 5.82484000  | 0.13842400  |
| H | 4.15269500  | 4.09078700  | -0.17523500 |
| C | -2.76821500 | -0.29377200 | -0.04270600 |
| C | -3.34320900 | -1.56803800 | 0.03830200  |
| C | -3.60118600 | 0.82941900  | -0.11753200 |
| C | -4.71927400 | -1.71933000 | 0.04836900  |
| H | -2.69714900 | -2.43558100 | 0.09519300  |
| C | -4.97809800 | 0.68549900  | -0.11155500 |
| H | -3.15441700 | 1.81411800  | -0.18103700 |
| C | -5.55713900 | -0.59281000 | -0.02644000 |
| H | -5.16011500 | -2.70745600 | 0.11456900  |
| H | -5.61916500 | 1.55758100  | -0.17160100 |
| C | 1.63835700  | -2.24436700 | -0.04303000 |
| C | 1.08008500  | -3.52783500 | 0.00062400  |
| C | 3.03129200  | -2.10490100 | -0.07957800 |
| C | 1.89288300  | -4.64846000 | 0.01033300  |
| H | 0.00243200  | -3.63353800 | 0.02809800  |
| C | 3.85029900  | -3.22102800 | -0.07144100 |
| H | 3.46110600  | -1.11124500 | -0.11289700 |
| C | 3.29154500  | -4.51036700 | -0.02481900 |
| H | 1.45634400  | -5.64003700 | 0.04669300  |
| H | 4.92808600  | -3.10839500 | -0.09976400 |
| C | -6.96967700 | -0.74435300 | -0.01376000 |
| C | -8.17740200 | -0.87457900 | -0.00036400 |

|   |              |              |             |
|---|--------------|--------------|-------------|
| C | 4.12929800   | -5.65766300  | -0.01072100 |
| C | 4.84652700   | -6.63782000  | 0.00485000  |
| C | 2.83618700   | 6.40984500   | -0.00044900 |
| C | 3.32458200   | 7.50485400   | 0.01578600  |
| C | -9.58994100  | -1.02750500  | 0.01681000  |
| C | -10.18188200 | -2.28815100  | 0.18364400  |
| C | -10.44220700 | 0.07662700   | -0.13143900 |
| C | -11.56731700 | -2.37730100  | 0.19370400  |
| H | -9.56960400  | -3.17407100  | 0.30259600  |
| C | -11.81439900 | -0.13307300  | -0.10568300 |
| H | -10.03715300 | 1.07283000   | -0.26342100 |
| H | -12.04471800 | -3.34543200  | 0.32221900  |
| H | -12.49129300 | 0.70995900   | -0.21906900 |
| C | 5.68635200   | -7.78376100  | 0.02544200  |
| C | 7.08321400   | -7.65982800  | 0.05607700  |
| C | 5.14847600   | -9.07915800  | 0.01734800  |
| C | 7.85398000   | -8.81437700  | 0.07694400  |
| H | 7.55061800   | -6.68238900  | 0.06365600  |
| C | 6.01782600   | -10.16138600 | 0.03996100  |
| H | 4.07601900   | -9.23145100  | -0.00602100 |
| H | 8.93815200   | -8.73890500  | 0.10114000  |
| H | 5.62018500   | -11.17312200 | 0.03411000  |
| C | 3.90424400   | 8.80145200   | 0.03640100  |
| C | 5.28852400   | 8.98037200   | -0.10407000 |
| C | 3.11327700   | 9.94861600   | 0.19834700  |
| C | 5.79937100   | 10.27096000  | -0.07599400 |
| H | 5.94515500   | 8.12807400   | -0.23175300 |
| C | 3.73510300   | 11.18980200  | 0.21126300  |
| H | 2.03884800   | 9.86688300   | 0.31143300  |
| H | 6.86935600   | 10.43013100  | -0.18334300 |
| H | 3.13923400   | 12.09042300  | 0.33594000  |
| N | -12.38598300 | -1.33050900  | 0.05308100  |
| N | 7.34931100   | -10.05172600 | 0.06950100  |
| N | 5.05274600   | 11.36862700  | 0.07791100  |

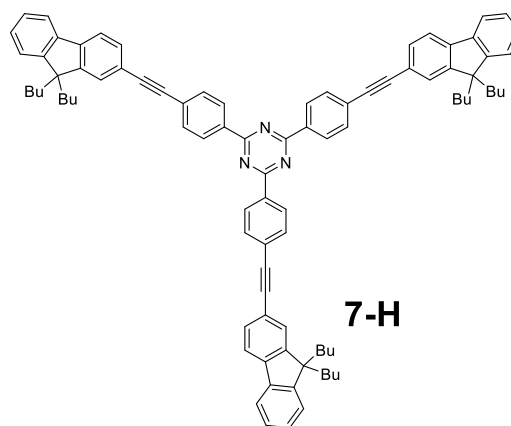

**7-H**

|   |            |             |             |
|---|------------|-------------|-------------|
| C | 7.53991900 | -3.16734600 | -0.34116700 |
| C | 6.41867500 | -2.69694700 | -0.33775000 |
| C | 5.10893600 | -2.14576100 | -0.33532400 |
| C | 4.05893800 | -2.79576300 | 0.33535100  |
| H | 4.25505500 | -3.72302700 | 0.86146900  |
| C | 2.78022300 | -2.26039400 | 0.33537700  |
| H | 1.96868000 | -2.76375300 | 0.84555300  |
| C | 4.83706800 | -0.93992300 | -1.00384800 |
| H | 5.63554000 | -0.43044300 | -1.53104600 |
| C | 3.55976500 | -0.40126000 | -1.00064500 |
| H | 3.35044000 | 0.53134600  | -1.50926600 |
| C | 2.53287500 | -1.06334200 | -0.33210100 |
| N | 1.20047100 | -0.50396300 | -0.33075900 |
| C | 0.18004400 | -1.41627500 | -0.32849100 |

# Supporting Information

|   |             |             |             |
|---|-------------|-------------|-------------|
| C | -6.51025000 | -4.94924700 | -0.32996800 |
| C | -5.54325800 | -4.21208400 | -0.32778000 |
| C | -4.41176000 | -3.35243500 | -0.32773300 |
| C | -4.45279500 | -2.11306500 | 0.33332300  |
| H | -5.35608700 | -1.81551900 | 0.85352100  |
| C | -3.35012200 | -1.27295000 | 0.33167900  |
| H | -3.38326500 | -0.31467300 | 0.83445400  |
| C | -3.22880800 | -3.72421100 | -0.98898800 |
| H | -3.18440400 | -4.67420600 | -1.50916900 |
| C | -2.12397600 | -2.88691600 | -0.98748400 |
| H | -1.20966900 | -3.17519700 | -1.49057700 |
| C | -2.18672600 | -1.66173500 | -0.32805400 |
| N | -1.03580900 | -0.78749400 | -0.32864400 |
| C | -1.31535400 | 0.55240900  | -0.32953500 |
| C | -1.03477300 | 8.11156700  | -0.32565000 |
| C | -0.87767700 | 6.90582800  | -0.32616400 |
| C | -0.69752500 | 5.49629300  | -0.32828600 |
| C | 0.39451900  | 4.91190200  | 0.33559200  |
| H | 1.10164100  | 5.54510900  | 0.85913000  |
| C | 0.57113200  | 3.53692400  | 0.33308100  |
| H | 1.41554800  | 3.08583300  | 0.83878300  |
| C | -1.60816500 | 4.65816000  | -0.99397400 |
| H | -2.45145500 | 5.09499100  | -1.51656800 |
| C | -1.43487400 | 3.28277200  | -0.99364200 |
| H | -2.13938600 | 2.63531200  | -1.50028100 |
| C | -0.34485400 | 2.72435600  | -0.33057000 |
| N | -0.16297900 | 1.29086300  | -0.33069400 |
| C | 1.13723400  | 0.86331100  | -0.33224300 |
| C | -1.21437000 | 9.52132900  | -0.32276500 |
| C | -0.27586000 | 10.35492200 | 0.31795000  |
| C | -2.33225500 | 10.09336800 | -0.96056000 |
| C | -0.46814900 | 11.72361900 | 0.31018800  |
| H | 0.58348300  | 9.90768700  | 0.80746300  |
| C | -2.52238900 | 11.46825500 | -0.96612300 |
| H | -3.04784400 | 9.44238100  | -1.45055900 |
| C | -1.58831400 | 12.28449600 | -0.32915300 |
| H | -3.38944500 | 11.89257100 | -1.46226200 |
| C | 8.84944600  | -3.71940800 | -0.34209000 |
| C | 9.11059000  | -4.92783200 | 0.33445400  |
| C | 9.89402600  | -3.06129900 | -1.01990500 |
| C | 10.39069900 | -5.44899600 | 0.32190300  |
| H | 8.30083000  | -5.42958600 | 0.85465200  |
| C | 11.17828000 | -3.58753100 | -1.03058300 |
| H | 9.68151200  | -2.13213900 | -1.53705700 |
| C | 11.42653300 | -4.78374400 | -0.35830800 |
| H | 11.97164300 | -3.06743800 | -1.55789100 |
| C | 12.65572400 | -5.55910400 | -0.20131900 |
| C | 13.94548600 | -5.33080700 | -0.67852300 |
| C | 12.36615600 | -6.69497100 | 0.57402600  |
| C | 14.94480600 | -6.25099900 | -0.37197100 |
| H | 14.17222300 | -4.45448400 | -1.27799400 |
| C | 13.36677000 | -7.60786800 | 0.87568700  |
| C | 14.65901200 | -7.38006400 | 0.39838900  |
| H | 15.95474900 | -6.08944000 | -0.73500100 |
| H | 13.15654900 | -8.48975700 | 1.47399000  |
| C | 10.89981000 | -6.72440700 | 0.97484700  |
| C | 10.73558700 | -6.67457900 | 2.50209200  |
| H | 11.23319400 | -5.79701000 | 2.92365300  |
| H | 9.67629300  | -6.63344900 | 2.77402600  |
| H | 11.16674000 | -7.56875400 | 2.96271800  |
| C | 10.18930500 | -7.96392700 | 0.40880400  |
| H | 9.12221300  | -7.93948800 | 0.65054600  |
| H | 10.29447100 | -8.01660100 | -0.67822400 |
| H | 10.61122000 | -8.87705600 | 0.83978900  |
| C | -7.64250600 | -5.80812700 | -0.33114800 |
| C | -8.82686000 | -5.42151800 | 0.32760300  |

|   |              |              |             |
|---|--------------|--------------|-------------|
| C | -7.58700600  | -7.05113100  | -0.99114900 |
| C | -9.91762400  | -6.27034500  | 0.31531900  |
| H | -8.86253500  | -4.46235400  | 0.83435200  |
| C | -8.68426300  | -7.90102900  | -1.00166100 |
| H | -6.67047900  | -7.33828600  | -1.49461500 |
| C | -9.85156200  | -7.50942000  | -0.34696700 |
| H | -8.62458400  | -8.85537800  | -1.51515900 |
| C | -11.13882200 | -8.18495500  | -0.19382900 |
| C | -11.58050700 | -9.42286000  | -0.65835800 |
| C | -11.98616500 | -7.35609200  | 0.56123100  |
| C | -12.88021200 | -9.82439000  | -0.36003400 |
| H | -10.92843900 | -10.06553700 | -1.24183600 |
| C | -13.28006400 | -7.76244600  | 0.85495500  |
| C | -13.72350100 | -9.00211200  | 0.39005400  |
| H | -13.24112200 | -10.78495100 | -0.71352000 |
| H | -13.94486800 | -7.13110800  | 1.43753700  |
| C | -11.28352700 | -6.06556100  | 0.95138400  |
| C | -11.99729800 | -4.83923000  | 0.36113800  |
| H | -11.44724600 | -3.92301700  | 0.59726300  |
| H | -12.08295700 | -4.91838900  | -0.72600500 |
| H | -13.00417900 | -4.74465800  | 0.77930000  |
| C | -11.17411500 | -5.92754800  | 2.47805100  |
| H | -10.66626300 | -6.79089900  | 2.91645600  |
| H | -10.61265900 | -5.02648900  | 2.74371600  |
| H | -12.16888200 | -5.84917800  | 2.92736900  |
| C | -1.52910300  | 13.73702100  | -0.17603000 |
| C | -2.39178100  | 14.73711400  | -0.62194200 |
| C | -0.37269700  | 14.05794300  | 0.55544000  |
| C | -2.08596000  | 16.06387000  | -0.32933100 |
| H | -3.28605800  | 14.49224100  | -1.18676800 |
| C | -0.07398000  | 15.38215600  | 0.84338100  |
| C | -0.93714200  | 16.38469000  | 0.39677100  |
| H | -2.74617600  | 16.85564700  | -0.66858600 |
| H | 0.81650500   | 15.64399600  | 1.40765600  |
| C | 0.40348100   | 12.80504500  | 0.92891300  |
| C | 1.80958400   | 12.81156500  | 0.30865200  |
| H | 2.33275600   | 11.87671100  | 0.53246800  |
| H | 1.76089900   | 12.92686800  | -0.77753300 |
| H | 2.40359200   | 13.63559200  | 0.71574900  |
| C | 0.50144900   | 12.63962400  | 2.45357200  |
| H | -0.49023200  | 12.63187200  | 2.91397200  |
| H | 1.00584600   | 11.70195200  | 2.70674500  |
| H | 1.07753600   | 13.46058200  | 2.89141500  |
| H | -0.71319200  | 17.42374900  | 0.61631400  |
| H | -14.73363000 | -9.33007700  | 0.61380400  |
| H | 15.44937000  | -8.08747700  | 0.62838400  |

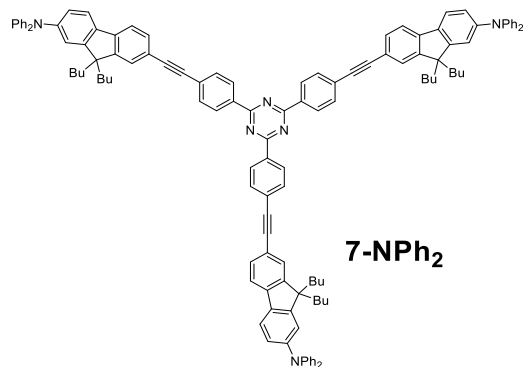

|   |            |             |             |
|---|------------|-------------|-------------|
| C | 8.18139100 | -0.26073900 | 0.37565200  |
| C | 6.97004100 | -0.22205400 | 0.27501100  |
| C | 5.55458500 | -0.17536700 | 0.16109700  |
| C | 4.85718900 | -1.17297100 | -0.54138500 |
| H | 5.40839800 | -1.98198200 | -1.00693800 |

## Supporting Information

|   |             |             |             |   |              |              |             |
|---|-------------|-------------|-------------|---|--------------|--------------|-------------|
| C | 3.47589800  | -1.12840400 | -0.64928500 | H | 12.43142000  | -3.77705700  | 1.26203400  |
| H | 2.93798500  | -1.90011900 | -1.18518800 | H | 11.41993000  | -4.20653600  | -0.12997700 |
| C | 4.82253000  | 0.86979300  | 0.75008700  | H | 13.15502200  | -4.55604600  | -0.15744500 |
| H | 5.34574200  | 1.64287400  | 1.30113400  | C | 12.62232300  | -2.55890700  | -1.99217300 |
| C | 3.44164200  | 0.91690500  | 0.63914600  | H | 11.64052800  | -2.91242400  | -2.32189400 |
| H | 2.87848400  | 1.72522700  | 1.08804800  | H | 12.81254700  | -1.58847800  | -2.45858100 |
| C | 2.76953800  | -0.08313300 | -0.05939100 | H | 13.37401300  | -3.26749300  | -2.35345900 |
| N | 1.33022000  | -0.03633400 | -0.17252600 | N | 17.67614500  | -2.22335800  | 0.18421600  |
| C | 0.70113400  | -1.25274000 | -0.17721300 | C | -5.03728200  | -8.14162700  | -0.50889700 |
| C | -4.28829900 | -6.93485900 | -0.47477900 | C | -6.33629100  | -8.18730900  | 0.03766100  |
| C | -3.64768400 | -5.90161700 | -0.44330100 | C | -4.48600500  | -9.30147100  | -1.08718900 |
| C | -2.89644400 | -4.69614100 | -0.40886300 | C | -7.04731400  | -9.37096500  | -0.00090700 |
| C | -3.42308500 | -3.53959800 | 0.19121100  | H | -6.75618800  | -7.29015100  | 0.48149800  |
| H | -4.41067900 | -3.57252100 | 0.63690600  | C | -5.20321900  | -10.48908300 | -1.12578200 |
| C | -2.69090900 | -2.36300200 | 0.22446400  | H | -3.48628400  | -9.25566300  | -1.50499700 |
| H | -3.09873200 | -1.46966100 | 0.68045700  | C | -6.48697400  | -10.52508100 | -0.58060900 |
| C | -1.61086300 | -4.63566500 | -0.97344900 | H | -4.76227100  | -11.37270400 | -1.57606300 |
| H | -1.19388800 | -5.51765800 | -1.44599000 | C | -7.45723000  | -11.60909200 | -0.47908800 |
| C | -0.87644800 | -3.46052800 | -0.93736400 | C | -7.40461000  | -12.93925600 | -0.89427700 |
| H | 0.11636700  | -3.41620000 | -1.36688600 | C | -8.60762000  | -11.11986500 | 0.16303200  |
| C | -1.41781600 | -2.32515900 | -0.33933900 | C | -8.49274000  | -13.76855200 | -0.65873600 |
| N | -0.65345700 | -1.09942500 | -0.30594700 | H | -6.52150600  | -13.33919800 | -1.38291300 |
| C | -1.38858800 | 0.05242200  | -0.38335300 | C | -9.70029400  | -11.93903700 | 0.38345600  |
| C | -3.82144700 | 7.20766300  | -0.67099100 | C | -9.64919200  | -13.28182400 | -0.02572200 |
| C | -3.24430600 | 6.13867600  | -0.61490800 | H | -8.45468500  | -14.80894700 | -0.96138600 |
| C | -2.57335800 | 4.88799700  | -0.54898900 | H | -10.59652300 | -11.56102200 | 0.86470900  |
| C | -1.40074800 | 4.74264900  | 0.21187500  | C | -8.44778100  | -9.65076300  | 0.52264700  |
| H | -1.00967700 | 5.59406000  | 0.75708600  | C | -9.49500700  | -8.78044900  | -0.18907100 |
| C | -0.74598900 | 3.52261400  | 0.27714900  | H | -9.32605300  | -7.72138400  | 0.02880500  |
| H | 0.16018200  | 3.41226200  | 0.85927800  | H | -9.45243300  | -8.91952100  | -1.27273100 |
| C | -3.06979400 | 3.76990300  | -1.24083700 | H | -10.50269600 | -9.03760200  | 0.15158300  |
| H | -3.96968400 | 3.86803200  | -1.83720200 | C | -8.53043500  | -9.43831900  | 2.04230900  |
| C | -2.41795500 | 2.54838300  | -1.17276000 | H | -7.78852600  | -10.04700600 | 2.56633100  |
| H | -2.80333700 | 1.68460200  | -1.69970100 | H | -8.35347400  | -8.38798900  | 2.29373000  |
| C | -1.25625000 | 2.42659200  | -0.41419600 | H | -9.52321600  | -9.71127100  | 2.41320600  |
| N | -0.57708400 | 1.15363600  | -0.33983700 | N | -10.74765700 | -14.13626400 | 0.19911100  |
| C | 0.78810300  | 1.21827100  | -0.25769400 | C | -6.30110200  | 12.28029100  | -0.75900200 |
| C | -4.49141800 | 8.45891400  | -0.73354900 | C | -7.41796200  | 12.91777500  | -1.29810800 |
| C | -3.97441000 | 9.57655400  | -0.04659300 | C | -5.40748400  | 12.99866400  | 0.05359100  |
| C | -5.67787900 | 8.59084600  | -1.48084400 | C | -7.62852600  | 14.26337100  | -1.02915100 |
| C | -4.63997600 | 10.78481500 | -0.11884100 | H | -8.11463700  | 12.38283800  | -1.93615700 |
| H | -3.05995700 | 9.46855000  | 0.52817000  | C | -5.62412400  | 14.33497300  | 0.33792800  |
| C | -6.34529900 | 9.80575300  | -1.55059900 | C | -6.74350500  | 14.98379700  | -0.20895500 |
| H | -6.06769600 | 7.72491200  | -2.00460500 | H | -8.48428100  | 14.77269200  | -1.45782500 |
| C | -5.82550000 | 10.90611200 | -0.86836000 | H | -4.94584300  | 14.88904400  | 0.97865400  |
| H | -7.25923400 | 9.88845300  | -2.13014200 | C | -4.27020800  | 12.10914500  | 0.53175300  |
| C | 9.59655300  | -0.30840200 | 0.49164400  | C | -2.91329800  | 12.62201500  | 0.02428000  |
| C | 10.32069600 | -1.38056000 | -0.06917200 | H | -2.10970500  | 11.94031800  | 0.31953700  |
| C | 10.28562300 | 0.71602700  | 1.16930300  | H | -2.90734200  | 12.70850800  | -1.06568000 |
| C | 11.69605400 | -1.40970300 | 0.05689900  | H | -2.69335700  | 13.60650800  | 0.44863600  |
| H | 9.78402500  | -2.16700000 | -0.59054800 | C | -4.25116800  | 11.99451600  | 2.06374500  |
| C | 11.66765300 | 0.68524500  | 1.29273700  | H | -5.21062700  | 11.63353500  | 2.44399100  |
| H | 9.71924000  | 1.53615000  | 1.59677000  | H | -3.46965600  | 11.30013500  | 2.38750400  |
| C | 12.37542300 | -0.38021700 | 0.73567900  | H | -4.04514200  | 12.96849200  | 2.51825700  |
| H | 12.18168400 | 1.48424300  | 1.81752600  | N | -6.97745800  | 16.34746100  | 0.06128400  |
| C | 13.80352700 | -0.67387400 | 0.70750000  | C | -11.49330400 | -14.03587800 | 1.39748800  |
| C | 14.89990100 | 0.01680500  | 1.22253000  | C | -10.84397400 | -13.86737300 | 2.62664500  |
| C | 13.99727800 | -1.88221700 | 0.01662200  | C | -12.89125500 | -14.10822600 | 1.37037100  |
| C | 16.17436500 | -0.50654800 | 1.05204700  | C | -11.58210800 | -13.76278000 | 3.80011500  |
| H | 14.77066500 | 0.94698900  | 1.76714000  | H | -9.76078000  | -13.81993500 | 2.65614500  |
| C | 15.26734800 | -2.39770100 | -0.16956200 | C | -13.62024400 | -14.02135700 | 2.55115600  |
| C | 16.37440900 | -1.71001000 | 0.35448900  | H | -13.40089800 | -14.23237800 | 0.42104300  |
| H | 17.03166000 | 0.01365800  | 1.46423600  | C | -12.97296400 | -13.84325300 | 3.77202800  |
| H | 15.42264800 | -3.32244000 | -0.71580900 | H | -11.06289000 | -13.63270200 | 4.74441000  |
| C | 12.67182500 | -2.45603200 | -0.45991600 | H | -14.70343400 | -14.07936400 | 2.51216800  |
| C | 12.40316900 | -3.83150900 | 0.17034900  | H | -13.54531500 | -13.76875700 | 4.69057700  |

# Supporting Information

|   |              |              |             |
|---|--------------|--------------|-------------|
| C | -11.11572600 | -15.09437500 | -0.77478100 |
| C | -11.48288900 | -16.38963700 | -0.39025700 |
| C | -11.12238500 | -14.76008200 | -2.13452300 |
| C | -11.85581700 | -17.32550100 | -1.34845500 |
| H | -11.47340200 | -16.65712500 | 0.66081700  |
| C | -11.47931700 | -15.70792200 | -3.08697800 |
| H | -10.84820800 | -13.75574700 | -2.43877600 |
| C | -11.85235300 | -16.99401000 | -2.70177300 |
| H | -12.13743900 | -18.32525000 | -1.03318200 |
| H | -11.47948800 | -15.43204800 | -4.13678700 |
| H | -12.13727300 | -17.72884000 | -3.44724100 |
| C | -8.29580900  | 16.81527600  | 0.27326400  |
| C | -9.19590600  | 16.07715400  | 1.05153200  |
| C | -8.71640400  | 18.02635800  | -0.28957000 |
| C | -10.49168400 | 16.53968400  | 1.25153500  |
| H | -8.87398400  | 15.14271600  | 1.49832100  |
| C | -10.00843300 | 18.49002100  | -0.06881500 |
| H | -8.02640000  | 18.59959900  | -0.89920900 |
| C | -10.90570200 | 17.74948100  | 0.69786400  |
| H | -11.17655000 | 15.95536300  | 1.85793600  |
| H | -10.31819200 | 19.43092800  | -0.51259000 |
| H | -11.91528200 | 18.11088200  | 0.86219700  |
| C | -5.89407300  | 17.25503300  | 0.13068600  |
| C | -5.84988000  | 18.23036100  | 1.13423200  |
| C | -4.85413800  | 17.19364700  | -0.80511200 |
| C | -4.78995000  | 19.12836900  | 1.19223800  |
| H | -6.64879700  | 18.27969900  | 1.86611100  |
| C | -3.78920800  | 18.08407900  | -0.72824700 |
| H | -4.88667000  | 16.44699100  | -1.59115200 |
| C | -3.75090300  | 19.05900400  | 0.26662700  |
| H | -4.77143300  | 19.87822900  | 1.97682400  |
| H | -2.99166100  | 18.02279600  | -1.46197600 |
| H | -2.92192200  | 19.75679300  | 0.31919900  |
| C | 17.90753300  | -3.61696600  | 0.26300100  |
| C | 17.28574700  | -4.38613700  | 1.25430300  |
| C | 18.76565900  | -4.24513700  | -0.64769000 |
| C | 17.51215200  | -5.75615400  | 1.32267200  |
| H | 16.62705800  | -3.90466200  | 1.96896200  |
| C | 19.00045100  | -5.61278900  | -0.56011100 |
| H | 19.24549400  | -3.65653100  | -1.42207300 |
| C | 18.37312600  | -6.37809500  | 0.42067100  |
| H | 17.02248100  | -6.33736100  | 2.09767200  |
| H | 19.66863700  | -6.08378500  | -1.27417800 |
| H | 18.55324000  | -7.44612600  | 0.48171200  |
| C | 18.75888400  | -1.34830500  | -0.06922400 |
| C | 19.98918600  | -1.54003200  | 0.57091700  |
| C | 18.61644100  | -0.28239300  | -0.96596900 |
| C | 21.05480000  | -0.68584200  | 0.31035700  |
| H | 20.10401800  | -2.35979400  | 1.27176700  |
| C | 19.68205400  | 0.57760000   | -1.20639400 |
| H | 17.66883800  | -0.13381100  | -1.47235900 |
| C | 20.90828600  | 0.38020600   | -0.57477900 |
| H | 22.00181200  | -0.84848900  | 0.81524500  |
| H | 19.55490900  | 1.39876600   | -1.90476400 |
| H | 21.73980500  | 1.04895100   | -0.77035600 |

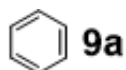

|   |             |             |             |
|---|-------------|-------------|-------------|
| C | -1.27191300 | 0.56972600  | 0.00000000  |
| C | -0.14245300 | 1.38625900  | -0.00002800 |
| C | 1.12934700  | 0.81654900  | 0.00001100  |
| C | 1.27189200  | -0.56977200 | -0.00000600 |
| C | 0.14250300  | -1.38625300 | -0.00001200 |
| C | -1.12937700 | -0.81650800 | 0.00002000  |
| H | -2.26250500 | 1.01367600  | 0.00000600  |

|   |             |             |             |
|---|-------------|-------------|-------------|
| H | -0.25336600 | 2.46612300  | 0.00002200  |
| H | 2.00910500  | 1.45248500  | 0.00005200  |
| H | 2.26254000  | -1.01359800 | 0.00002300  |
| H | 0.25328500  | -2.46613200 | -0.00003000 |
| H | -2.00905500 | -1.45255500 | 0.00002000  |

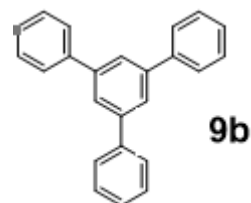

|   |             |             |            |
|---|-------------|-------------|------------|
| C | 1.38127100  | 0.00000000  | 0.00000000 |
| C | 0.70676100  | -1.22517000 | 0.00000000 |
| C | -0.69161600 | -1.19681600 | 0.00000000 |
| C | -1.41535600 | 0.00000000  | 0.00000000 |
| C | -0.69161600 | 1.19681600  | 0.00000000 |
| C | 0.70676100  | 1.22517000  | 0.00000000 |
| H | 2.46064100  | 0.00000000  | 0.00000000 |
| H | -1.23141900 | -2.13164000 | 0.00000000 |
| H | -1.23141900 | 2.13164000  | 0.00000000 |
| C | -2.90746500 | 0.00000000  | 0.00000000 |
| C | -3.64302800 | 1.19595100  | 0.00000000 |
| C | -3.64302800 | -1.19595100 | 0.00000000 |
| C | -5.03327400 | 1.19795100  | 0.00000000 |
| H | -3.13877500 | 2.15447000  | 0.00000000 |
| C | -5.03327400 | -1.19795100 | 0.00000000 |
| H | -3.13877500 | -2.15447000 | 0.00000000 |
| C | -5.74098600 | 0.00000000  | 0.00000000 |
| H | -5.56311400 | 2.14519500  | 0.00000000 |
| H | -5.56311400 | -2.14519500 | 0.00000000 |
| H | -6.82598600 | 0.00000000  | 0.00000000 |
| C | 1.45339100  | 2.51714600  | 0.00000000 |
| C | 0.78595400  | 3.75242500  | 0.00000000 |
| C | 2.85701800  | 2.55541200  | 0.00000000 |
| C | 1.47997800  | 4.95700200  | 0.00000000 |
| H | -0.29623300 | 3.79535000  | 0.00000000 |
| C | 3.55446600  | 3.75799700  | 0.00000000 |
| H | 3.43465700  | 1.63921900  | 0.00000000 |
| C | 2.87135400  | 4.97013700  | 0.00000000 |
| H | 0.92515200  | 5.88983300  | 0.00000000 |
| H | 4.63971400  | 3.74275300  | 0.00000000 |
| H | 3.41427300  | 5.90954300  | 0.00000000 |
| C | 1.45339100  | -2.51714600 | 0.00000000 |
| C | 0.78595400  | -3.75242500 | 0.00000000 |
| C | 2.85701800  | -2.55541200 | 0.00000000 |
| C | 1.47997800  | -4.95700200 | 0.00000000 |
| H | -0.29623300 | -3.79535100 | 0.00000000 |
| C | 3.55446600  | -3.75799600 | 0.00000000 |
| H | 3.43465700  | -1.63921900 | 0.00000000 |
| C | 2.87135400  | -4.97013700 | 0.00000000 |
| H | 0.92515200  | -5.88983300 | 0.00000000 |
| H | 4.63971400  | -3.74275300 | 0.00000000 |
| H | 3.41427300  | -5.90954300 | 0.00000000 |

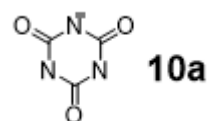

|   |            |            |             |
|---|------------|------------|-------------|
| N | 0.00000000 | 0.00000000 | -1.32756300 |
| C | 0.00000000 | 1.24805200 | -0.70436600 |
| O | 0.00000000 | 2.29364300 | -1.33299000 |
| N | 0.00000000 | 1.18547800 | 0.66037100  |

# Supporting Information

|   |            |             |             |
|---|------------|-------------|-------------|
| C | 0.00000000 | 0.00000000  | 1.36851000  |
| O | 0.00000000 | 0.00000000  | 2.70409200  |
| N | 0.00000000 | -1.18547800 | 0.66037100  |
| C | 0.00000000 | -1.24805200 | -0.70436600 |
| O | 0.00000000 | -2.29364300 | -1.33299000 |
| H | 0.00000000 | -2.06263000 | 1.16036900  |
| H | 0.00000000 | 2.06263000  | 1.16036900  |
| H | 0.00000000 | 0.00000000  | -2.33654600 |

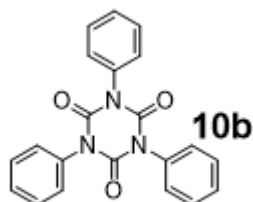

|   |             |             |             |
|---|-------------|-------------|-------------|
| N | 1.34246900  | -0.17588700 | 0.00001300  |
| C | 0.86667000  | 1.13087900  | -0.00026000 |
| O | 1.60313200  | 2.09135800  | -0.00045000 |
| N | -0.51869700 | 1.25071500  | -0.00026800 |
| C | -1.41227500 | 0.18517100  | -0.00004400 |
| O | -2.61226000 | 0.34273000  | -0.00006000 |
| N | -0.82352000 | -1.07468400 | 0.00020700  |
| C | 0.54598200  | -1.31595800 | 0.00023300  |
| O | 1.00974200  | -2.43391900 | 0.00042700  |
| C | 2.77059900  | -0.36291500 | 0.00005000  |
| C | 3.44740600  | -0.45099400 | 1.21098100  |
| C | 3.44728100  | -0.45231400 | -1.21085900 |
| C | 4.82709600  | -0.63191100 | 1.20724100  |
| H | 2.89723100  | -0.37849800 | 2.14281200  |
| C | 4.82696500  | -0.63323800 | -1.20707000 |
| H | 2.89699900  | -0.38081000 | -2.14270300 |
| C | 5.51633900  | -0.72306300 | 0.00010100  |
| H | 5.36232100  | -0.70166000 | 2.14808600  |
| H | 5.36209700  | -0.70402200 | -2.14789000 |
| H | 6.59202600  | -0.86427400 | 0.00011700  |
| C | -1.07084400 | 2.58097900  | -0.00052400 |
| C | -1.33264000 | 3.21102300  | -1.21159200 |
| C | -1.33281000 | 3.21141300  | 1.21031000  |
| C | -1.86568600 | 4.49636800  | -1.20806700 |
| H | -1.11992200 | 2.69814800  | -2.14324900 |
| C | -1.86585100 | 4.49675200  | 1.20630000  |
| H | -1.12021600 | 2.69882800  | 2.14215600  |
| C | -2.13212400 | 5.13867300  | -0.00100700 |
| H | -2.07250200 | 4.99480500  | -2.14897700 |
| H | -2.07280100 | 4.99549800  | 2.14701800  |
| H | -2.54769800 | 6.14085500  | -0.00119100 |
| C | -1.69982100 | -2.21786800 | 0.00047100  |
| C | -2.11493700 | -2.75938000 | 1.21157800  |
| C | -2.11504900 | -2.75985400 | -1.21039100 |
| C | -2.96136700 | -3.86383100 | 1.20802400  |
| H | -1.77738700 | -2.31871800 | 2.14330100  |
| C | -2.96147300 | -3.86430100 | -1.20632800 |
| H | -1.77757700 | -2.31954800 | -2.14231000 |
| C | -3.38432600 | -4.41581100 | 0.00097700  |
| H | -3.28976100 | -4.29207700 | 2.14891000  |
| H | -3.28995700 | -4.29292400 | -2.14701200 |
| H | -4.04434000 | -5.27686500 | 0.00117100  |

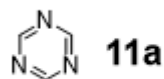

|   |             |             |            |
|---|-------------|-------------|------------|
| N | 1.18724100  | 0.68445800  | 0.00000000 |
| C | 0.00000000  | 1.29017600  | 0.00000000 |
| N | -1.18637900 | 0.68595200  | 0.00000000 |
| C | -1.11732500 | -0.64508800 | 0.00000000 |
| N | -0.00086200 | -1.37041000 | 0.00000000 |
| C | 1.11732500  | -0.64508800 | 0.00000000 |
| H | 2.05795300  | -1.18976900 | 0.00000000 |
| H | 0.00139400  | 2.37712400  | 0.00000000 |
| H | -2.05934700 | -1.18735500 | 0.00000000 |

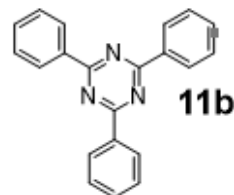

|   |             |             |             |
|---|-------------|-------------|-------------|
| N | 1.18172353  | 0.68187957  | 0.00000000  |
| C | 1.13170086  | -0.65360663 | 0.00000000  |
| N | 0.00013509  | -1.36481336 | 0.00000000  |
| C | -1.13142112 | -0.65369865 | 0.00000000  |
| N | -1.18157946 | 0.68183267  | -0.00000000 |
| C | -0.00000000 | 1.30619495  | -0.00000000 |
| C | -0.00009941 | 2.78420357  | -0.00000000 |
| C | -1.20842131 | 3.49104550  | -0.00000000 |
| C | 1.20808181  | 3.49134857  | 0.00000000  |
| C | -1.20695520 | 4.88035489  | -0.00000000 |
| H | -2.14058751 | 2.93882122  | -0.00000000 |
| C | 1.20627303  | 4.88063538  | 0.00000000  |
| H | 2.14034741  | 2.93931201  | 0.00000000  |
| C | -0.00043735 | 5.57841188  | -0.00000000 |
| H | -2.14805570 | 5.42044331  | -0.00000000 |
| H | 2.14722797  | 5.42097799  | 0.00000000  |
| H | -0.00056214 | 6.66370134  | -0.00000000 |
| C | 2.41188695  | -1.39240893 | 0.00000000  |
| C | 3.62808635  | -0.69911557 | 0.00000000  |
| C | 2.42051615  | -2.79233786 | 0.00000000  |
| C | 4.83066252  | -1.39479500 | 0.00000000  |
| H | 3.61574405  | 0.38430263  | 0.00000000  |
| C | 3.62474264  | -3.48513050 | 0.00000000  |
| H | 1.47647436  | -3.32402447 | 0.00000000  |
| C | 4.83222372  | -2.78869980 | 0.00000000  |
| H | 5.76883896  | -0.84964125 | 0.00000000  |
| H | 3.62247628  | -4.57019402 | 0.00000000  |
| H | 5.77229538  | -3.33102768 | 0.00000000  |
| C | -2.41163614 | -1.39238617 | -0.00000000 |
| C | -2.42039583 | -2.79230423 | 0.00000000  |
| C | -3.62776909 | -0.69897201 | -0.00000000 |
| C | -3.62470930 | -3.48498308 | -0.00000000 |
| H | -1.47643365 | -3.32411750 | -0.00000000 |
| C | -4.83040012 | -1.39452434 | -0.00000000 |
| H | -3.61534914 | 0.38445136  | -0.00000000 |
| C | -4.83210889 | -2.78844717 | 0.00000000  |
| H | -3.62252666 | -4.57004848 | 0.00000000  |
| H | -5.76852584 | -0.84928446 | -0.00000000 |
| H | -5.77223966 | -3.33067290 | -0.00000000 |

## 6. Selected frontier MOs for 3-X, 4 and 7-X

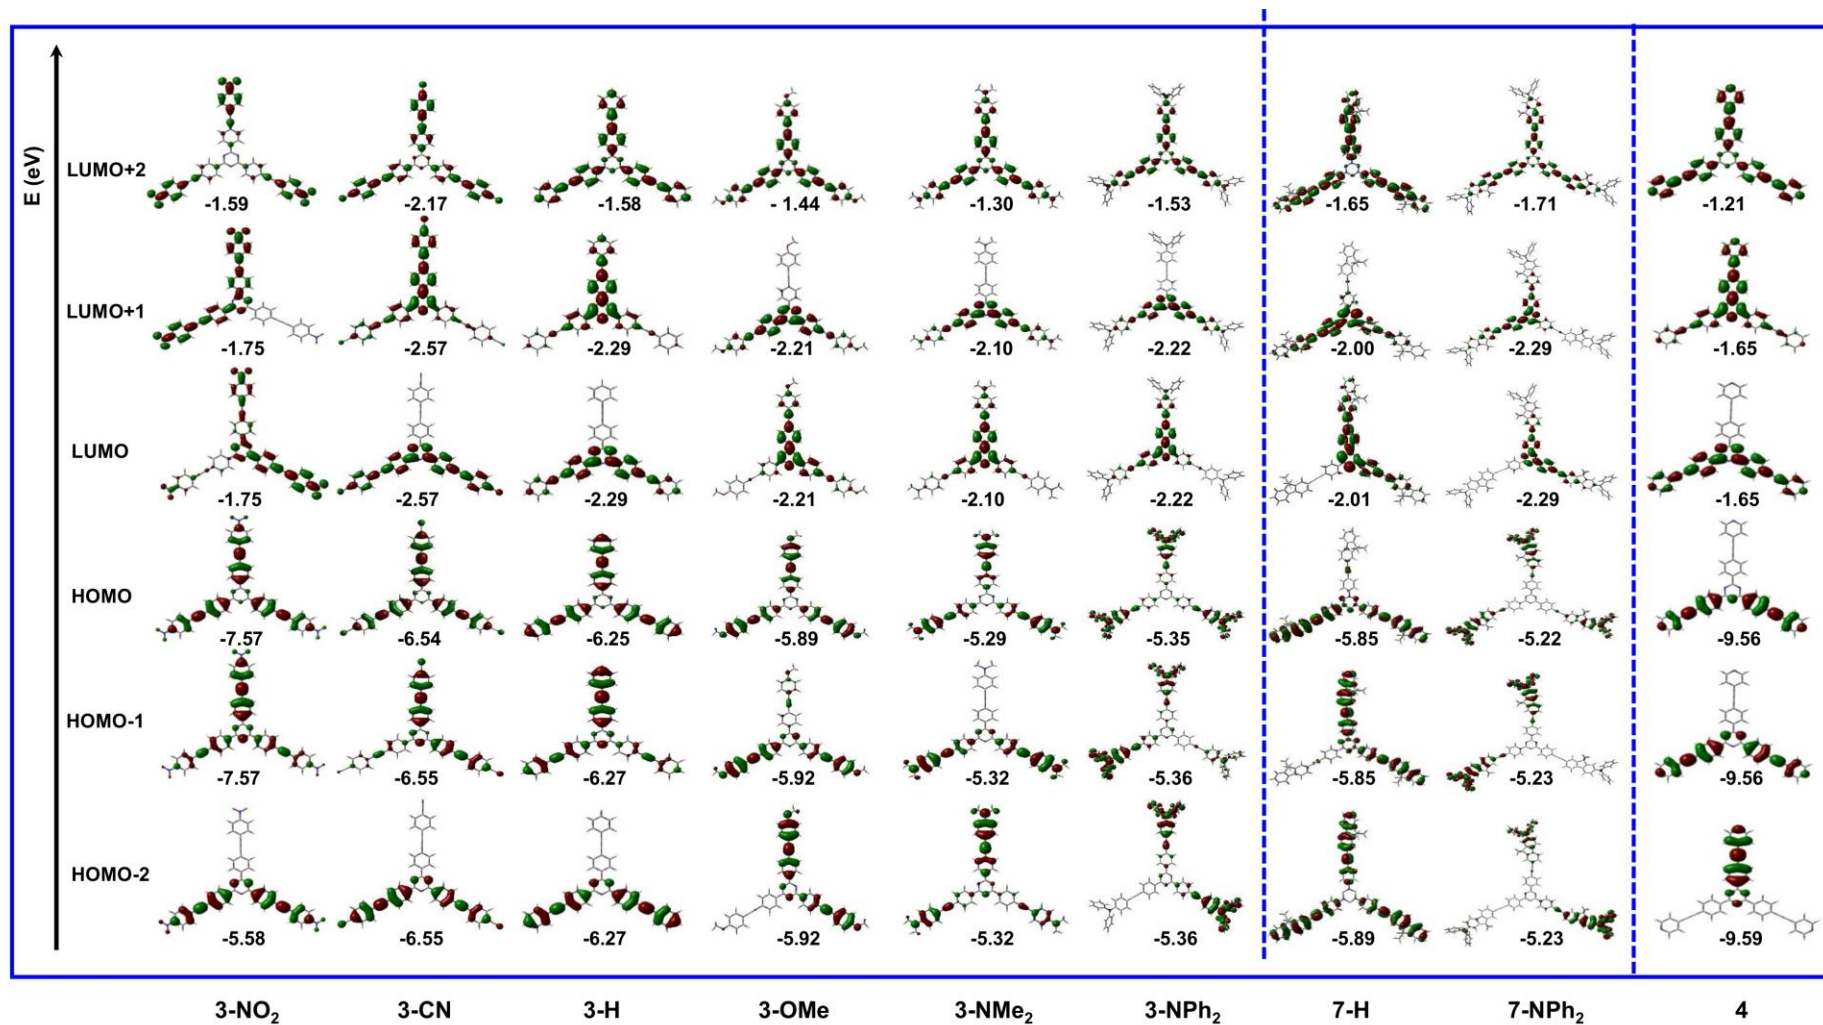

Figure S10. FMOs of 3-X, 4 and 7-X compounds. Contour values are  $\pm 0.02$  (e/bohr<sup>3</sup>)<sup>1/2</sup>.

| 3-NO <sub>2</sub> |                                                                                      |
|-------------------|--------------------------------------------------------------------------------------|
| LUMO+4            | 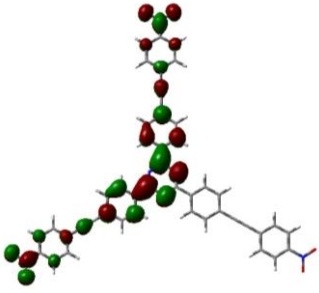   |
| LUMO+3            |    |
| 3-CN              |                                                                                      |
| HOMO-4            |   |
| HOMO-5            |  |
| HOMO-6            |  |
| 3-H               |                                                                                      |
| LUMO+4            |  |

*Supporting Information*

|         |                                                                                      |
|---------|--------------------------------------------------------------------------------------|
| LUMO+3  | 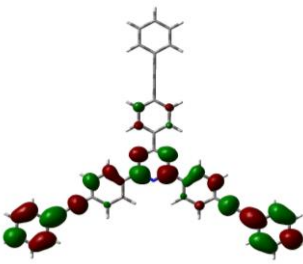   |
| HOMO-3  |    |
| HOMO-4  |    |
| HOMO-5  |  |
| HOMO-11 |  |
| HOMO-12 |  |
| 3-OMe   |                                                                                      |

*Supporting Information*

|                          |                                                                                      |
|--------------------------|--------------------------------------------------------------------------------------|
| <b>HOMO-3</b>            | 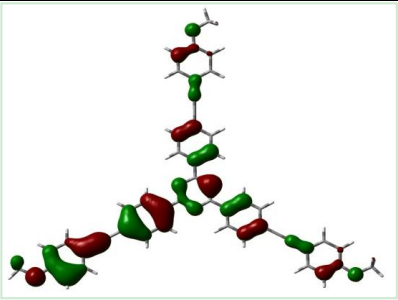   |
| <b>HOMO-4</b>            |    |
| <b>3-NMe<sub>2</sub></b> |                                                                                      |
| <b>HOMO-3</b>            |   |
| <b>HOMO-4</b>            |  |
| <b>HOMO-5</b>            |  |
| <b>3-NPh<sub>2</sub></b> |                                                                                      |
| <b>HOMO-3</b>            |  |

*Supporting Information*

|               |                                                                                      |
|---------------|--------------------------------------------------------------------------------------|
| <b>HOMO-4</b> | 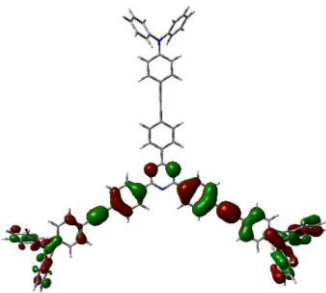   |
| <b>HOMO-5</b> |    |
| <b>7-H</b>    |                                                                                      |
| <b>LUMO+4</b> |   |
| <b>LUMO+3</b> |  |
| <b>HOMO-3</b> |  |
| <b>HOMO-4</b> |  |

|                    |                                                                                      |
|--------------------|--------------------------------------------------------------------------------------|
| HOMO-5             | 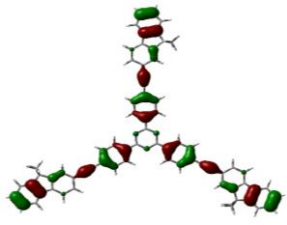   |
| HOMO-6             |    |
| HOMO-7             |    |
| 7-NPh <sub>2</sub> |                                                                                      |
| HOMO-3             |   |
| HOMO-4             |  |
| HOMO-6             |  |
| HOMO-7             |  |

**Figure S11.** Selected additional MOs of **3-X** and **7-X** Compounds. Contour values are  $\pm 0.02$  (e/bohr<sup>3</sup>)<sup>1/2</sup>.

## 7. Computed dipole moments for 3-X, 4 and 7-X

**Table S2.** Calculated (MPW1PW91/6-31G\* level in CH<sub>2</sub>Cl<sub>2</sub>) mean deviation (°) from planarity and dipole moment (D) for selected 3-X, 4 and 7-X derivatives.

| Cmpd                | Mean deviation<br>from planarity<br>(°) <sup>a</sup> | μ (D) |
|---------------------|------------------------------------------------------|-------|
| 3-NO <sub>2</sub>   | 0.00                                                 | 0.00  |
| 3-CN                | 0.00                                                 | 0.02  |
| 3-H                 | 0.00                                                 | 0.00  |
| 3-OMe               | 0.02                                                 | 3.19  |
| 3- NMe <sub>2</sub> | 0.01                                                 | 0.02  |
| 3-NPh <sub>2</sub>  | 0.22                                                 | 0.02  |
| 4                   | 1.95                                                 | 0.08  |
| 7-H                 | 0.4                                                  | 0.17  |
| 7-NPh <sub>2</sub>  | 0.7                                                  | 0.01  |

<sup>a</sup> Mean value of the three angles between the peripheral phenyl plane and the plane of the central core.

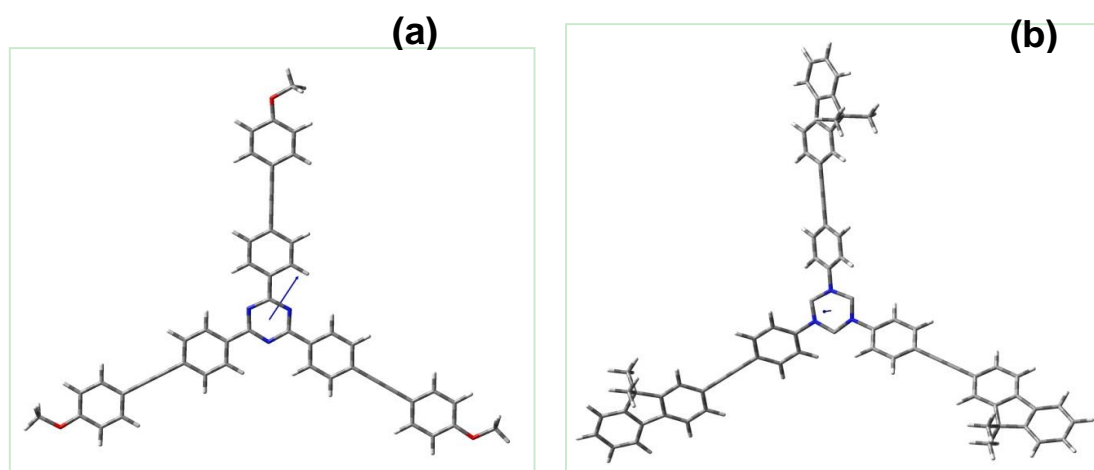

**Figure S12.** Dipole moments computed for 3-OMe (a) and 7-H (b). The main component of the dipole moment is “in” the plane of the central triazine core and results from the non-symmetric arrangement of the peripheral arms.

## 8. Computed bandgaps for 3-X, 4 and 7-X

**Table S3.** Calculated HOMO-LUMO energy gaps in CH<sub>2</sub>Cl<sub>2</sub> for 3-X (MPW1PW91 or CAM-B3LYP/6-31G\* level in CH<sub>2</sub>Cl<sub>2</sub>).

| X                 | HOMO-LUMO gaps (eV) |           |
|-------------------|---------------------|-----------|
|                   | MPW1PW91            | CAM-B3LYP |
| 3-NO <sub>2</sub> | 3.78                | 5.82      |
| CN                | 3.97                | 5.99      |
| H                 | 3.96                | 6.00      |
| OMe               | 3.68                | 5.71      |
| NMe <sub>2</sub>  | 3.19                | 5.18      |
| NPh <sub>2</sub>  | 3.13                | 5.11      |

## 9. Computed singlet lowest-lying transitions for 3-X, 4 and 7-X

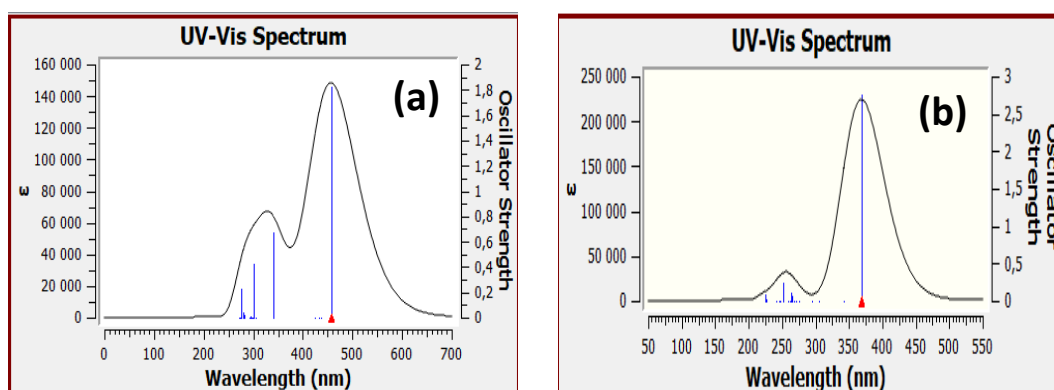**Figure S13.** Computed TD-DFT (6-31G\*/CH<sub>2</sub>Cl<sub>2</sub>) spectra for 3-NPh<sub>2</sub> compounds using MPW1PW91 (a) or CAM-B3LYP functionals (b).

# Supporting Information

**Table S4.** Nature of the relevant first computed (MPW1PW91/6-31G\*) singlet excited states<sup>a</sup> ( $\lambda_{\text{max}}$  and  $\lambda_{\text{cal}}$  in nm, Oscillator Strength, excited state number ( $S_n$ ), transition percentage and assignment) with  $f \geq 0.1$  vs. experimental *values* in CH<sub>2</sub>Cl<sub>2</sub> (PCM).

| Model Cpnd<br>[Real Cpnd] | Experimental<br>$\lambda_{\text{max}}$ [ $\varepsilon$ ] <sup>b</sup> | Calculated for optimized geometry   |                                                                    |                                                                               | Major<br>Assignment <sup>f</sup>                                |
|---------------------------|-----------------------------------------------------------------------|-------------------------------------|--------------------------------------------------------------------|-------------------------------------------------------------------------------|-----------------------------------------------------------------|
|                           |                                                                       | $\lambda_{\text{max}}$ <sup>c</sup> | $\lambda_{\text{cal}}$ [ $f$ ] <sup>d</sup> ( $S_n$ ) <sup>e</sup> | Composition                                                                   |                                                                 |
| <b>3-NO<sub>2</sub></b>   | 377 [113]                                                             | 392                                 | 392 [2.50] ( $S_1$ )                                               | H→L (29%)<br>H-2→L (20%)<br>H-1→L+1 (19%)<br>H→L+1 (13%)<br>H-1→L+2 (11%)     | $(\pi^*)_{\text{Ph+Tri+NO}_2} \leftarrow (\pi)_{\text{Ph+Tri}}$ |
|                           |                                                                       |                                     | 392 [2.50] ( $S_2$ )                                               | H→L+1 (29%)<br>H-1→L (21%)<br>H-2→L+1 (20%)<br>H→L (11%)<br>H-2→L+2 (11%)     | <i>ibid</i>                                                     |
|                           |                                                                       | 309                                 | 309 [0.13] ( $S_{13}$ )                                            | H→L+4 (40%)<br>H-2→L+3 (15%)<br>H-1→L+4 (14%)                                 | $(\pi^*)_{\text{Ph+Tri+NO}_2} \leftarrow (\pi)_{\text{Ph+Tri}}$ |
|                           |                                                                       |                                     | 309 [0.13] ( $S_{14}$ )                                            | H→L+3 (37%)<br>H-1→L+3 (16%)                                                  | <i>ibid</i>                                                     |
| <b>3-CN</b>               | 352 [154]                                                             | 374                                 | 374 [2.58] ( $S_1$ )                                               | H→L+1 (+45%)<br>H-2→L (+20%)<br>H-1→L+1 (+17%)                                | $(\pi^*)_{\text{Ph+Tri+CN}} \leftarrow (\pi)_{\text{Ph+Tri}}$   |
|                           |                                                                       |                                     | 374 [2.59] ( $S_2$ )                                               | H→L (35%)<br>H-1→L (26%)<br>H-2→L+1 (22%)                                     | <i>ibid</i>                                                     |
|                           | 332 [sh, 142]                                                         | 310                                 | 310 [0.27] ( $S_7$ )                                               | H-1→L+2 (76%)<br>H-1→L+2 (14%)                                                | $(\pi^*)_{\text{Ph+Tri+CN}} \leftarrow (\pi)_{\text{Ph+Tri}}$   |
|                           |                                                                       |                                     | 310 [0.27] ( $S_8$ )                                               | H-2→L+2 (84%)                                                                 | <i>ibid</i>                                                     |
| <b>3-H</b>                | /                                                                     | 372                                 | 372 [2.03] ( $S_1$ )                                               | H→L+1 (49%)<br>H-2→L (23%)<br>H-1→L+1 (22%)                                   | $(\pi^*)_{\text{Ph+Tri}} \leftarrow (\pi)_{\text{Ph+Tri}}$      |
|                           |                                                                       |                                     | 372 [2.03] ( $S_2$ )                                               | H→L (47%)<br>H-1→L (24%)<br>H-2→L (23%)                                       | <i>ibid</i>                                                     |
|                           | /                                                                     | 290                                 | 293 [0.44] ( $S_{11}$ )                                            | H-1→L+2 (93%)                                                                 | $(\pi^*)_{\text{Ph}} \leftarrow (\pi)_{\text{Ph}}$              |
|                           |                                                                       |                                     | 293 [0.44] ( $S_{12}$ )                                            | H-2→L+2 (93%)                                                                 | <i>ibid</i>                                                     |
|                           |                                                                       |                                     | 255 [0.17] ( $S_{30}$ )                                            | H-11→L+1 (25%)<br>H-12→L (25%)<br>H→L+4 (15%)<br>H-13→L+1 (13%)               | $(\pi^*) \leftarrow (\pi)$                                      |
| <b>3-OMe</b>              | 359 [122]                                                             | 398                                 | 398 [2.04] ( $S_1$ )                                               | H→L+1 (52%)<br>H-2→L (12%)<br>H-1→L+1 (11%)<br>H-1→L+1 (11%)<br>H-2→L+1 (10%) | $(\pi^*)_{\text{Ph+Tri}} \leftarrow (\pi)_{\text{Ph+Tri+OMe}}$  |
|                           |                                                                       |                                     | 398 [1.95] ( $S_2$ )                                               | H→L (49%)<br>H-1→L (12%)<br>H-2→L (12%)<br>H-2→L+1 (12%)<br>H-1→L+1 (11%)     | <i>ibid</i>                                                     |

# Supporting Information

|                          |              |     |                               |                                                                                              |                                                                             |
|--------------------------|--------------|-----|-------------------------------|----------------------------------------------------------------------------------------------|-----------------------------------------------------------------------------|
|                          |              |     | 382 [0.00] (S <sub>3</sub> )  | H-1→L+2 (48%)<br>H-2→L+1 (46%)                                                               | <i>Ibid</i> <sup>s</sup>                                                    |
|                          | 270 [51]     | 300 | 306 [0.44] (S <sub>7</sub> )  | H-1→L+2 (93%)                                                                                | ( $\pi^*$ ) <sub>Ph+OMe</sub> ← ( $\pi$ ) <sub>Ph+OMe</sub>                 |
|                          |              |     | 306 [0.44] (S <sub>8</sub> )  | H-2→L+2 (92%)                                                                                | <i>ibid</i>                                                                 |
|                          |              |     | 274 [0.22] (S <sub>18</sub> ) | H-3→L+1 (20%)<br>H-4→L (19%)<br>H-5→L+1 (18%)<br>H-4→L+1 (11%)<br>H-3→L (10%)                | ( $\pi^*$ ) ← ( $\pi$ )                                                     |
| <b>3-NMe<sub>2</sub></b> | 405 [105]    | 457 | 457 [1.82] (S <sub>1</sub> )  | H→L (47%)<br>H-1→L+1 (20%)<br>H-2→L (12%)                                                    | ( $\pi^*$ ) <sub>Ph+Tri</sub> ← ( $\pi$ ) <sub>Ph+Tri+NMe<sub>2</sub></sub> |
|                          |              |     | 457 [1.82] (S <sub>2</sub> )  | H→L+1 (34%)<br>H-1→L (13%)<br>H-2→L+1 (13%)                                                  | <i>ibid</i>                                                                 |
|                          | 301 [89]     | 340 | 340 [0.67] (S <sub>7</sub> )  | H-1→L+2 (89%)                                                                                | ( $\pi^*$ ) <sub>Ph+OMe</sub> ← ( $\pi$ ) <sub>Ph+NMe<sub>2</sub></sub>     |
|                          |              |     | 340 [0.67] (S <sub>8</sub> )  | H-2→L+2 (89%)                                                                                | <i>ibid</i>                                                                 |
|                          |              |     | 301 [0.22] (S <sub>18</sub> ) | H-5→L (22%)<br>H-3→L+1 (17%)<br>H-4→L (17%)<br>H-3→L (12%)<br>H-4→L+1 (12%)<br>H-5→L+1 (10%) | ( $\pi^*$ ) ← ( $\pi$ )                                                     |
| <b>3-NPh<sub>2</sub></b> | 406 [99]     | 465 | 465 [1.83] (S <sub>1</sub> )  | H→L (31%)<br>H→L+1 (20%)<br>H-2→L (19%)<br>H-1→L+1 (18%)                                     | ( $\pi^*$ ) <sub>Ph+Tri</sub> ← ( $\pi$ ) <sub>Ph+NPh<sub>2</sub></sub>     |
|                          |              |     | 465 [1.83] (S <sub>2</sub> )  | H→L+1 (30%)<br>H-1→L (20%)<br>H-2→L+1 (19%)<br>H→L (19%)                                     | <i>ibid</i>                                                                 |
|                          | 309 [100]    | 340 | 359 [0.72] (S <sub>7</sub> )  | H-1→L+2 (84%)                                                                                | ( $\pi^*$ ) <sub>Ph+OMe</sub> ← ( $\pi$ ) <sub>Ph+NMe<sub>2</sub></sub>     |
|                          |              |     | 359 [0.72] (S <sub>8</sub> )  | H-2→L+2 (85%)                                                                                | <i>ibid</i>                                                                 |
|                          |              |     | 330 [0.57] (S <sub>11</sub> ) | H-4→L+1 (29%)<br>H-5→L+2 (27%)<br>H-3→L+1 (13%)<br>H-3→L (10%)<br>H-4→L (9%)                 | ( $\pi^*$ ) ← ( $\pi$ )                                                     |
| <b>4</b>                 | 339 [112]    | 356 | 356 [2.15] (S <sub>1</sub> )  | H→L (70%)<br>H-1→L (24%)                                                                     | ( $\pi^*$ ) <sub>Py+Tri</sub> ← ( $\pi$ ) <sub>Py+Tri</sub>                 |
|                          |              |     | 354 [2.13] (S <sub>2</sub> )  | H-2→L+1 (57%)<br>H-1→L (29%)                                                                 | <i>ibid</i>                                                                 |
|                          | 270 [sh, 21] | 289 | 289 [0.33] (S <sub>11</sub> ) | H-1→L+2 (91%)                                                                                | ( $\pi^*$ ) ← ( $\pi$ )                                                     |
|                          |              |     | 289 [0.26] (S <sub>12</sub> ) | H→L+2 (71%)<br>H-2→L+2 (20%)                                                                 | <i>ibid</i>                                                                 |
|                          | 377 [173]    | 410 | 410 [2.5] (S <sub>1</sub> )   | H→L+1 (49%)<br>H-1→L (16%)<br>H-2→L+1 (15%)                                                  | ( $\pi^*$ ) <sub>Flu+Tri</sub> ← ( $n$ ) <sub>Flu</sub>                     |
|                          |              |     | 410 [2.5] (S <sub>2</sub> )   | H→L (+47%)<br>H-2→L (17%)<br>H-1→L+1 (16%)                                                   | <i>ibid</i>                                                                 |
|                          | 321 [67]     | 325 | 325 [0.62] (S <sub>8</sub> )  | H-1→L+2 (88%)                                                                                | ( $\pi^*$ ) <sub>Flu+Tri</sub> ← ( $\pi$ ) <sub>Flu</sub>                   |

## Supporting Information

|                          |               |     |                         |                                               |                                                                            |
|--------------------------|---------------|-----|-------------------------|-----------------------------------------------|----------------------------------------------------------------------------|
|                          |               |     | 325 [0.62] ( $S_9$ )    | H-2→L+2 (88%)                                 | <i>ibid</i>                                                                |
|                          | 295 [66]      | 296 | 296 [0.18] ( $S_{15}$ ) | H-5→L+1 (30%)<br>H-4→L+1 (23%)<br>H-3→L (21%) | $(\pi^*)_{\text{Flu}+\leftarrow}(\pi)_{\text{Flu}}$                        |
|                          |               |     | 296 [0.18] ( $S_{16}$ ) | H-5→L (32%)<br>H-3→L+1 (22%)<br>H-4→L (21%)   | <i>ibid</i>                                                                |
| <b>7-NPh<sub>2</sub></b> | 406 [129]     | 483 | 483 [1.72] ( $S_1$ )    | H→L+1 (50%)<br>H-1→L (17%)<br>H-2→L+1 (11%)   | $(\pi^*)_{\text{Flu}+\text{Tri}}\leftarrow(\pi)_{\text{Flu}+\text{NPh}_2}$ |
|                          |               |     | 483 [1.72] ( $S_2$ )    | H→L (38%)<br>H-2→L (16%)<br>H-1→L+1 (16%)     | <i>ibid</i>                                                                |
|                          | 334 [105]     | 388 | 388 [1.20] ( $S_7$ )    | H-1→L+2 (72%)                                 | $(\pi^*)_{\text{Flu}}\leftarrow(\pi)_{\text{Flu}+\text{NPh}_2}$            |
|                          |               |     | 388 [1.20] ( $S_8$ )    | H-2→L+2 (71%)                                 | <i>ibid</i>                                                                |
|                          | 317 [sh, 101] | 369 | 369 [0.63] ( $S_{10}$ ) | H-3→L+1 (35%)<br>H-5→L (19%)<br>H-4→L+1 (18%) | $(\pi^*)_{\text{Flu}}\leftarrow(\pi)_{\text{Flu}+\text{NPh}_2}$            |
|                          |               |     | 369 [0.63] ( $S_{11}$ ) | H-3→L (33%)<br>H-4→L (21%)<br>H-5→L+1 (19%)   | <i>ibid</i>                                                                |

<sup>a</sup> excited states calculated after optimisation are all <sup>1</sup>A. <sup>b</sup> Experimental absorption (nm) and extinction coefficients ( $\epsilon$ ) in  $10^3 \text{ M}^{-1}\text{cm}^{-1}$ . <sup>c</sup>  $\lambda_{\text{max}}$  and  $\lambda_{\text{cal}}$  are the maximum wavelength obtained from the simulated absorption bands, and the TD-DFT calculated wavelength of a singlet excitation, respectively in nm. <sup>d</sup> Computed oscillator strength. <sup>e</sup> Excited state number. <sup>f</sup> Tri: s-triazine core, Flu: fluorene core, Ph/Py: phenyl or pyridyl rings. <sup>g</sup> Forbidden transition (A symmetry) corresponding  $S_1$  and  $S_2$  ( $E$  symmetry set in strict  $D_3$  symmetry).

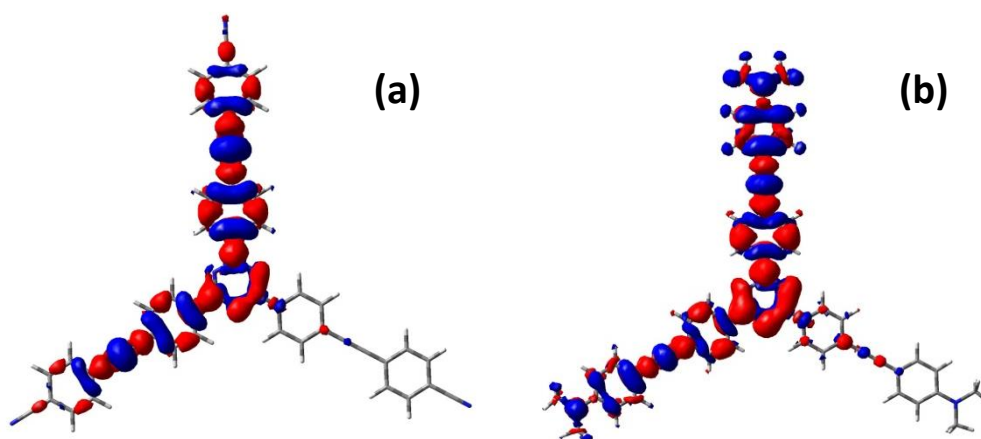

**Figure S14.** Density difference plots ( $\Delta\rho(r) = \rho_{S_1}(r) - \rho_{S_0}(r)$ ) computed for **3-CN** (a) and **3-NMe<sub>2</sub>** (b) between  $S_1$  and  $S_0$  states (red = increase, blue = decrease of electron density; isovalue 0.02 au).

## Supporting Information

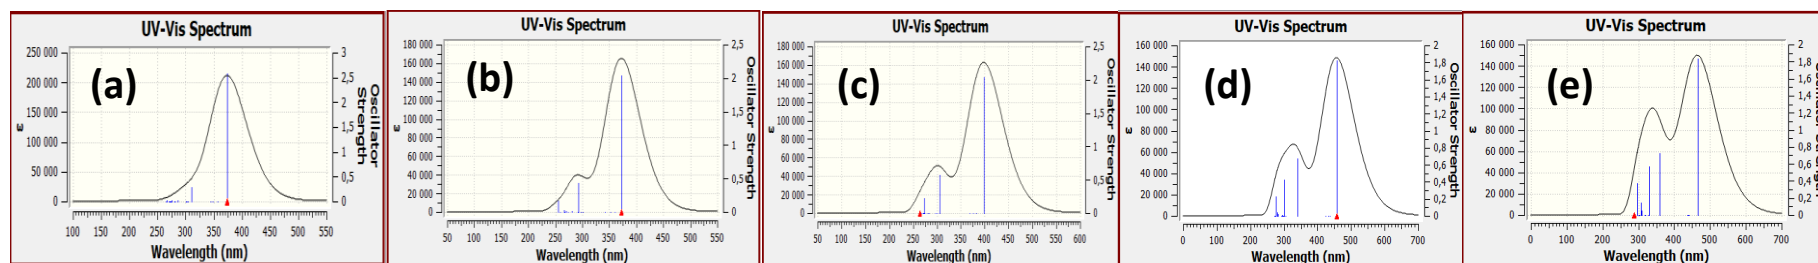

**Figure S15.** Computed TD-DFT spectra (MPW1PW91/6-31G\*/CH<sub>2</sub>Cl<sub>2</sub>) for **3-X** compounds; X = CN (a), H (b), OMe (c), NMe<sub>2</sub> (d) and NPh<sub>2</sub> (e).

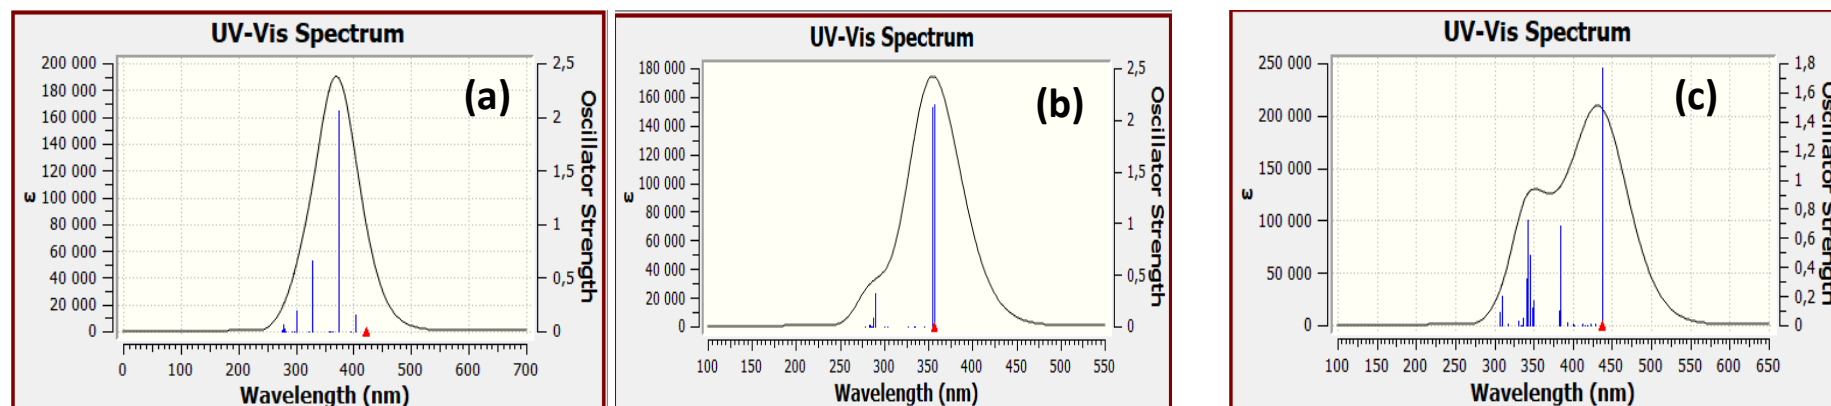

**Figure S16.** Computed TD-DFT spectra (MPW1PW91/6-31G\*/CH<sub>2</sub>Cl<sub>2</sub>) for **7-X** compounds (X = H (a) and NPh<sub>2</sub> (b)) and **4** (c).

## 10. Computed 2PA spectra for selected 3-X and 7-X compounds

Method used to derive the 2PA cross-sections:

The 2PA cross-section  $\sigma^{TPA}$  has been obtained from the imaginary part of the third-order hyperpolarizability  $\gamma$  using the following expressions: <sup>1,2</sup>

$$(1) \quad \sigma^{TPA} = \frac{N\pi^3\alpha^2\hbar^3\omega^2}{15e^4}\gamma^{TPA}$$

$$(2) \quad \gamma^{TPA} = \sum_{\alpha\beta} (\text{Im}\gamma_{\alpha\alpha\beta\beta} + \text{Im}\gamma_{\alpha\beta\beta\alpha} + \text{Im}\gamma_{\alpha\beta\alpha\beta})$$

Where  $\alpha$  is the fine structure constant (not to be confused with the  $\alpha$  index of the summation in eq 2),  $e$  is the elementary charge,  $\omega$  is the photon energy,  $\hbar$  is the reduced Planck's constant whereas the integer value  $N = 4$  is used for all simulated TPA spectra.<sup>2</sup>

The  $\sigma^{TPA}$  value is usually given in Göppert-Mayer units ( $1 \text{ GM} = 10^{-50} \text{ cm}^4 \text{ s photon}^{-1}$ ).<sup>3</sup>

We first evaluate  $\sigma^{TPA}$  in atomic units and then multiply it by  $(0.529177 \times 10^{-8} \text{ cm/a.u.})^4 \times (2.418884 \times 10^{-17} \text{ s/a.u.})$  to obtain its value in the conventional units ( $\text{cm}^4 \text{ s photon}^{-1}$ ).

<sup>1</sup> Silverstein, D. W.; Jensen, L. *J. Chem. Phys.* (2012) 136:064111.

<sup>2</sup> Beerepoot, M. T. P.; Friese, D. H.; List, N. H. Kongsted, J.; Ruuda, K. *Phys. Chem. Chem. Phys.* **2015**, 17, 19306-19314.

<sup>3</sup> Göppert-Mayer, M. *Ann Phys (Leipzig)* **1931**, 9,273-294.

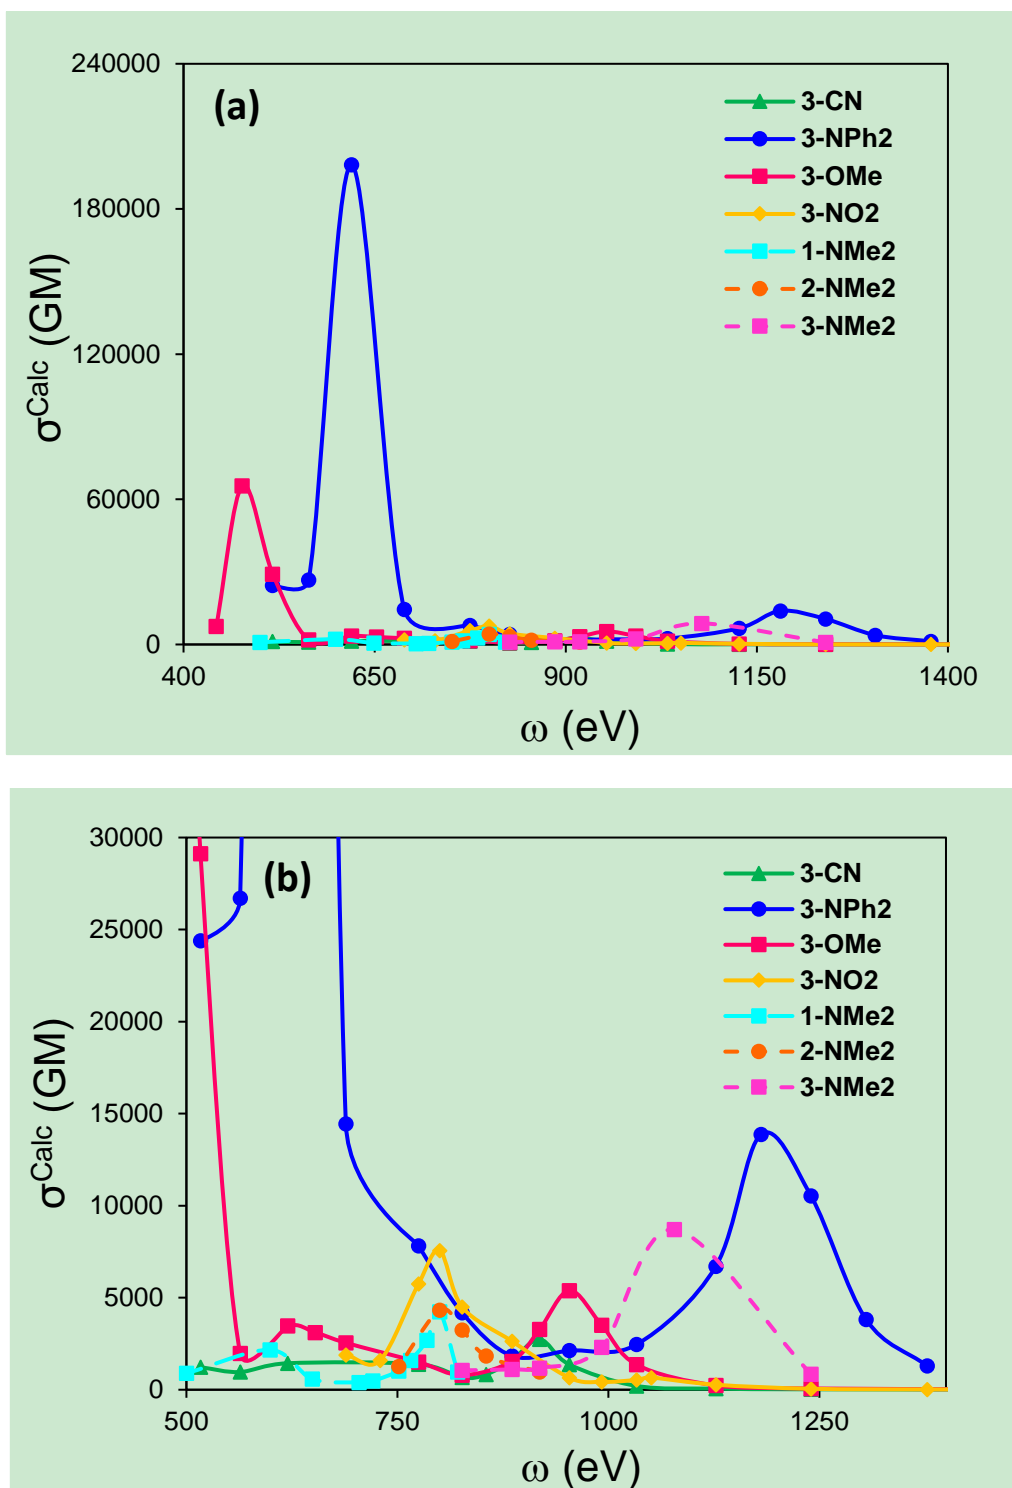

**Figure S17.** (a) Theoretical TPA profiles for selected 3-X and 7-X compounds computed at the SAOP/DZP level. (b) Detailed view.

**Table S5.** Computed energies and cross-sections for 2PA maxima at the SAOP/DZP level.

| Cpnd                      | 2PA           |                     |
|---------------------------|---------------|---------------------|
|                           | $\omega$ (eV) | $\sigma^{TPA}$ (GM) |
| <b>3-NO<sub>2</sub></b>   | 1.18          | 660                 |
|                           | 1.55          | 7560                |
| <b>3-CN</b>               | 1.35          | 2735                |
|                           | 2             | 1440                |
| <b>3-OMe</b>              | 1.3           | 5391                |
|                           | 2.6           | 65605               |
| <b>3-NPh<sub>2</sub></b>  | 1.05          | 13875               |
|                           | 2             | 198231              |
| <b>7-H</b>                | 1.2           | 7260                |
|                           | 1.45          | 3323                |
| <b>7- NPh<sub>2</sub></b> | 0.9           | 21531               |
|                           | 1.4           | 9074                |

11. Derivation of  $N_{\text{eff}}$  values for 1-X, 2-X, 3-X, 4, 7-X and 7-X derivatives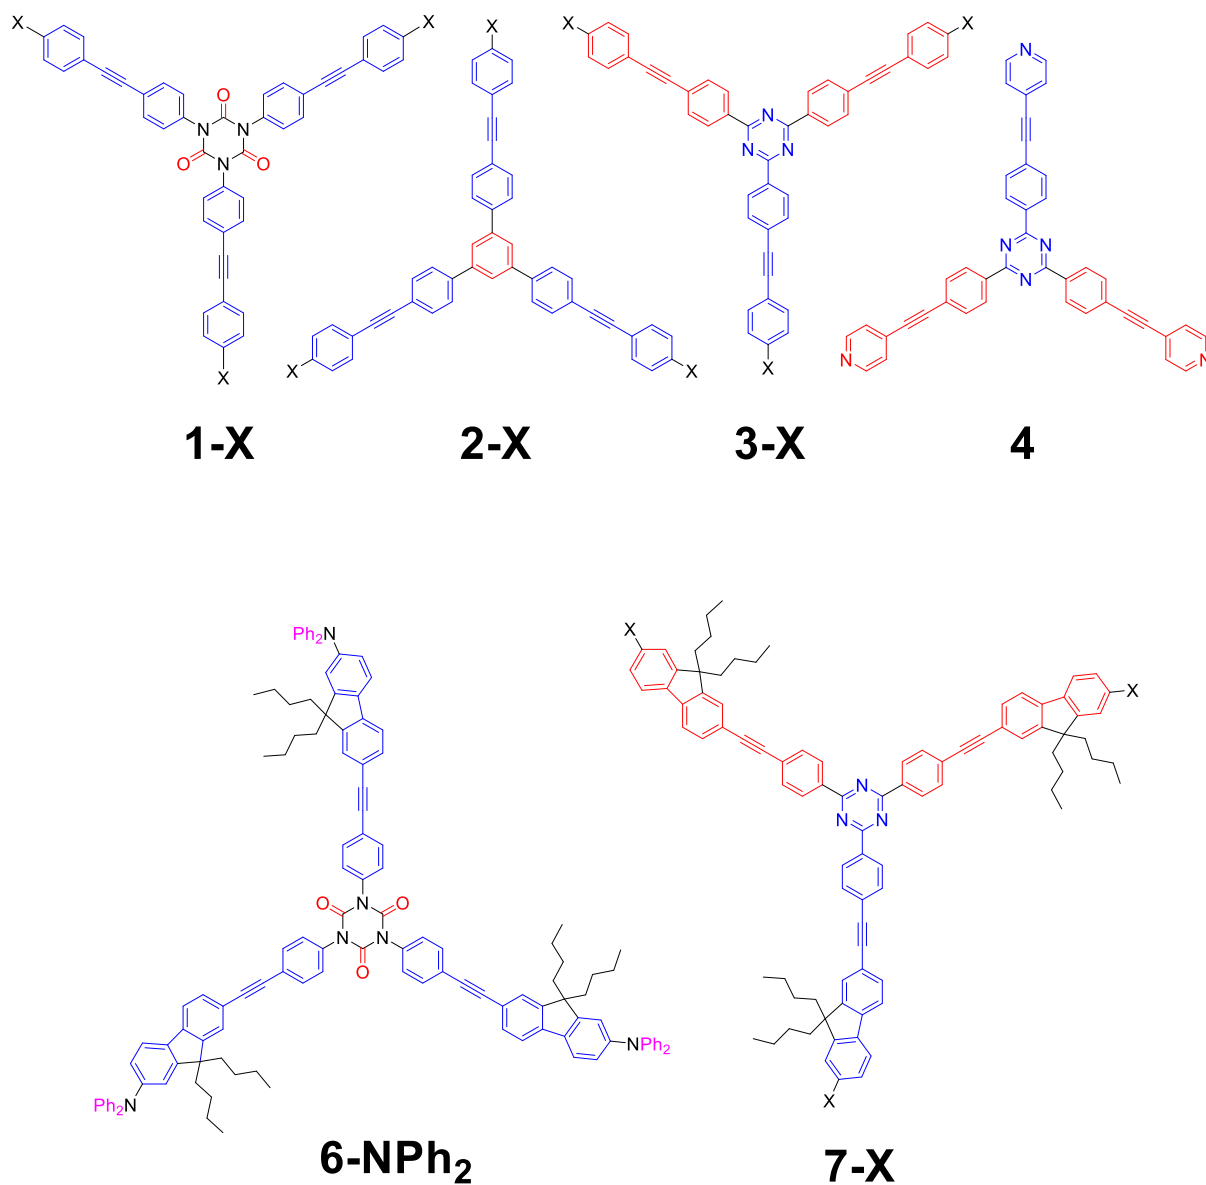

**Figure S18.** The independent  $\pi$ -manifolds (containing each  $N_i$   $\pi$ -electrons) which were considered in the various compounds for the calculation of  $N_{\text{eff}}$  (using the formula:  $(N_{\text{eff}})^2 = \sum_i (N_i)^2$ ) are set in different colors. These were chosen based on conformational and topological issues. For X = CN, the  $N_i$  value for the attendant  $\pi$ -manifold was incremented of two units) and for X = NPh<sub>2</sub>, two additional  $\pi$ -manifold of 6 electrons each were considered).

## 12. References

1. Furukawa, H.; Go, Y. B.; Ko, N.; Park, Y. K.; Uribe-Romo, F. J.; Kim, J.; O'Keefe, M.; Yaghi, O. M., Isoreticular Expansion of Metal-Organic Frameworks with Triangular and Square Building Units and the Lowest Calculated Density for Porous Crystals. *Inorg. Chem.* **2011**, 50, 9147–9152.
2. Berger, R.; Hauser, J.; Labat, G.; Weber, E.; Hulliger, J., New symmetrically substituted 1,3,5-triazines as host compounds for channel-type inclusion formation. *Cryst. Eng. Comm.* **2012**, 14, 768–770.
3. Hu, Q. Y.; Lu, W. X.; Tang, H. D.; Sung, H. H. Y.; Wen, T. B.; Williams, I. D.; Wong, G. K. L.; Lin, Z.; Jia, G., Synthesis and photophysical properties of trimetallic acetylide complexes with a 1,3,5-triazine core. *Organometallics* **2005**, 24, 3966-3973.
4. Das, P.; Kumar, A.; Chowdhury, A.; Mukherjee, P. S., Aggregation-Induced Emission and White Luminescence from a Combination of  $\pi$ -Conjugated Donor–Acceptor Organic Luminogens. *ACS Omega* **2018**, 3, 13757-71.
5. Ranganathan, A.; Heisen, B. C.; Dix, I.; Meyer, F., A triazine-based three directional rigid-rod tecton forms a novel 1D channel structure. *Chem. Commun.* **2007**, 3637-3639.
6. Lee, C.-H.; Yamamoto, T., Synthesis of Liquid-Crystalline, Highly Luminescent  $\pi$ -Conjugated 1,3,5-Triazine Derivatives by Palladium-Catalyzed Cross-Coupling Reaction. *Mol. Cryst. Liq. Cryst.* **2002**, 378, 13-21.
